# Supplementary material for: HIV-1 Vpr Modulates Macrophage Metabolic Pathways: A SILAC-Based Quantitative Analysis
Source: PLoS One. 2013 Jul 12;8(7):e68376. doi: 10.1371/journal.pone.0068376 (PMC3709966; doi:10.1371/journal.pone.0068376)
Supplement: File S2 — (XLS) [file pone.0068376.s002.xls]

## Sheet: Canonical Pathways
Ingenuity Canonical Pathways	-log(p-value)	Ratio	Molecules
TCA Cycle II (Eukaryotic)	7.58E00	1.46E-01	SDHA,SUCLG1,DLST,FH,MDH2,OGDH
Glycolysis I	7.23E00	1.4E-01	GPI,TPI1,PKM,GAPDH,ALDOA,ALDOC
Caveolar-mediated Endocytosis Signaling	6.76E00	9.41E-02	ITGB1,ITGB2,ITGAM,HLA-A,ACTB,ACTA2,ACTG1,ITGAX
Virus Entry via Endocytic Pathways	6.13E00	8.08E-02	ITGB1,ITGB2,HLA-A,ACTB,ACTA2,CLTC,TFRC,ACTG1
Glutaryl-CoA Degradation	5.84E00	1.67E-01	HSD17B10,ACAT1,HSD17B4,HADHA
Gluconeogenesis I	5.77E00	1.02E-01	GPI,GAPDH,ALDOA,MDH2,ALDOC
Fatty Acid β-oxidation I	5.35E00	1.11E-01	HSD17B10,ACSL4,HSD17B4,ECI1,HADHA
Leukocyte Extravasation Signaling	5.34E00	4.98E-02	ITGB1,ITGB2,ITGAM,TIMP1,ACTB,ACTA2,CD44,PECAM1,ACTG1,MMP1
Mechanisms of Viral Exit from Host Cells	4.72E00	1.11E-01	ACTB,ACTA2,LMNB2,ACTG1,LMNB1
Paxillin Signaling	4.71E00	6.31E-02	ITGB1,ITGB2,ITGAM,ACTB,ACTA2,ACTG1,ITGAX
Tryptophan Degradation III (Eukaryotic)	4.7E00	8.33E-02	HSD17B10,ACAT1,HSD17B4,HADHA
Sucrose Degradation V (Mammalian)	4.52E00	1.58E-01	TPI1,ALDOA,ALDOC
MSP-RON Signaling Pathway	4.46E00	1E-01	ITGB2,ITGAM,ACTB,ACTA2,ACTG1
Integrin Signaling	4.42E00	4.35E-02	RAP2B,ITGB1,ITGB2,ITGAM,RALA,ACTB,ACTA2,ACTG1,ITGAX
NRF2-mediated Oxidative Stress Response	3.89E00	4.17E-02	FTL,ACTB,ACTA2,ACTG1,GSTP1,MGST3,GSTK1,FTH1
Mitochondrial Dysfunction	3.86E00	4.02E-02	HSD17B10,SDHA,ATP5B,ATP5A1,CYC1,OGDH,AIFM1
Clathrin-mediated Endocytosis Signaling	3.81E00	4.08E-02	ITGB1,ITGB2,ACTB,ACTA2,CLTC,RAB7A,TFRC,ACTG1
ILK Signaling	3.81E00	4.17E-02	ITGB1,ITGB2,ACTB,ACTA2,MYH9,VIM,MYH11,ACTG1
Isoleucine Degradation I	3.62E00	1E-01	HSD17B10,ACAT1,HADHA
Agrin Interactions at Neuromuscular Junction	3.6E00	7.25E-02	ITGB1,ITGB2,ACTB,ACTA2,ACTG1
Remodeling of Epithelial Adherens Junctions	3.6E00	7.35E-02	RALA,ACTB,ACTA2,RAB7A,ACTG1
Actin Cytoskeleton Signaling	3.39E00	3.36E-02	ITGB1,PFN1,ACTB,ACTA2,MYH9,MYH11,GSN,ACTG1
2-ketoglutarate Dehydrogenase Complex	3.39E00	2.22E-01	DLST,OGDH
Lipid Antigen Presentation by CD1	3.24E00	1.3E-01	CALR,PDIA3,FCER1G
Cellular Effects of Sildenafil (Viagra)	3.18E00	4.08E-02	PDIA3,ACTB,ACTA2,MYH9,MYH11,ACTG1
Hepatic Fibrosis / Hepatic Stellate Cell Activation	2.97E00	4.11E-02	TIMP1,ACTA2,MYH9,MYH11,MMP1,SERPINB2
Glutathione-mediated Detoxification	2.8E00	6.82E-02	GSTP1,MGST3,GSTK1
Ketolysis	2.62E00	1.11E-01	ACAT1,HADHA
UDP-N-acetyl-D-galactosamine Biosynthesis II	2.62E00	8.33E-02	HK1,GPI
Huntington's Disease Signaling	2.62E00	2.92E-02	SDHA,GNB1,CTSD,ATP5B,CLTC,HSPA5,HSPA2
Pentose Phosphate Pathway	2.53E00	9.09E-02	TKT,G6PD
RhoGDI Signaling	2.5E00	3.03E-02	ITGB1,GNB1,ACTB,ACTA2,CD44,ACTG1
Antigen Presentation Pathway	2.45E00	7.5E-02	CALR,HLA-A,PDIA3
Ketogenesis	2.45E00	9.52E-02	ACAT1,HADHA
Calcium Signaling	2.43E00	2.84E-02	RAP2B,CALR,LETM1,ACTA2,MYH9,MYH11
EIF2 Signaling	2.36E00	3E-02	RPL11,UBA52,RPL23A,RPLP0,RPL29,RPL13
Regulation of Actin-based Motility by Rho	2.32E00	4.49E-02	PFN1,ACTB,ACTA2,GSN
FAK Signaling	2.24E00	3.96E-02	ITGB1,ACTB,ACTA2,ACTG1
Mevalonate Pathway I	2.23E00	7.14E-02	ACAT1,HADHA
Aryl Hydrocarbon Receptor Signaling	2.22E00	3.11E-02	CTSD,HSP90AB1,GSTP1,MGST3,GSTK1
Crosstalk between Dendritic Cells and Natural Killer Cells	2.19E00	4.21E-02	HLA-A,ACTB,ACTA2,ACTG1
Epithelial Adherens Junction Signaling	2.14E00	3.4E-02	ACTB,ACTA2,MYH9,MYH11,ACTG1
Granzyme B Signaling	2.12E00	1.25E-01	LMNB2,LMNB1
Glutathione Redox Reactions I	2.12E00	8.7E-02	MGST3,GSTK1
Aldosterone Signaling in Epithelial Cells	2.06E00	2.98E-02	HSP90AB1,PDIA3,HSPD1,HSPA5,HSPA2
Tight Junction Signaling	2.04E00	3.11E-02	ACTB,ACTA2,MYH9,MYH11,ACTG1
Germ Cell-Sertoli Cell Junction Signaling	2.02E00	3.05E-02	ITGB1,ACTB,ACTA2,GSN,ACTG1
Superpathway of Geranylgeranyldiphosphate Biosynthesis I (via Mevalonate)	2.02E00	5.56E-02	ACAT1,HADHA
Signaling by Rho Family GTPases	1.91E00	2.37E-02	ITGB1,GNB1,ACTB,ACTA2,VIM,ACTG1
RhoA Signaling	1.78E00	3.33E-02	PFN1,ACTB,ACTA2,ACTG1
Glutamate Biosynthesis II	1.78E00	1.43E-01	GLUD2
Glutamate Degradation X	1.78E00	1.43E-01	GLUD2
Protein Ubiquitination Pathway	1.7E00	2.24E-02	USO1,HSP90AB1,HLA-A,HSPD1,HSPA5,HSPA2
Superpathway of Cholesterol Biosynthesis	1.62E00	2.33E-02	ACAT1,HADHA
Trehalose Degradation II (Trehalase)	1.61E00	1.25E-01	HK1
NADH Repair	1.61E00	1.11E-01	GAPDH
Thyroid Hormone Biosynthesis	1.61E00	1.43E-01	CTSD
Fatty Acid β-oxidation III (Unsaturated, Odd Number)	1.61E00	2E-01	ECI1
Oncostatin M Signaling	1.49E00	5.71E-02	CHI3L1,MMP1
Pentose Phosphate Pathway (Oxidative Branch)	1.48E00	1E-01	G6PD
Estrogen Biosynthesis	1.4E00	4.08E-02	HSD17B10,HSD17B4
VEGF Signaling	1.4E00	2.91E-02	ACTB,ACTA2,ACTG1
Gap Junction Signaling	1.39E00	2.27E-02	PDIA3,ACTB,ACTA2,ACTG1
Inhibition of Matrix Metalloproteases	1.38E00	5E-02	TIMP1,MMP1
Fcγ Receptor-mediated Phagocytosis in Macrophages and Monocytes	1.37E00	2.94E-02	ACTB,ACTA2,ACTG1
Cdc42 Signaling	1.35E00	2.26E-02	ITGB1,RALA,HLA-A,FCER1G
Arginine Biosynthesis IV	1.31E00	4.17E-02	GLUD2
Pentose Phosphate Pathway (Non-oxidative Branch)	1.31E00	7.69E-02	TKT
Ceramide Degradation	1.31E00	7.14E-02	ASAH1
GDP-glucose Biosynthesis	1.31E00	5.88E-02	HK1
GDP-mannose Biosynthesis	1.31E00	7.69E-02	GPI
Graft-versus-Host Disease Signaling	1.25E00	4E-02	HLA-A,FCER1G
Glucose and Glucose-1-phosphate Degradation	1.25E00	4.55E-02	HK1
Aspartate Degradation II	1.25E00	7.14E-02	MDH2
Autoimmune Thyroid Disease Signaling	1.24E00	3.28E-02	HLA-A,FCER1G
Sertoli Cell-Sertoli Cell Junction Signaling	1.23E00	2.05E-02	ITGB1,ACTB,ACTA2,ACTG1
Type I Diabetes Mellitus Signaling	1.21E00	2.5E-02	HLA-A,FCER1G,HSPD1
Role of Tissue Factor in Cancer	1.2E00	2.61E-02	ITGB1,P4HB,MMP1
Airway Pathology in Chronic Obstructive Pulmonary Disease	1.19E00	1.11E-01	MMP1
Sphingosine and Sphingosine-1-phosphate Metabolism	1.19E00	4.76E-02	ASAH1
IL-8 Signaling	1.17E00	1.95E-02	GNB1,ITGB2,ITGAM,ITGAX
Glioma Invasiveness Signaling	1.09E00	3.33E-02	TIMP1,CD44
TREM1 Signaling	1.06E00	2.82E-02	ITGB1,ITGAX
Xenobiotic Metabolism Signaling	1.04E00	1.67E-02	FTL,HSP90AB1,GSTP1,MGST3,GSTK1
Estrogen-Dependent Breast Cancer Signaling	1.03E00	2.78E-02	HSD17B10,HSD17B4
eNOS Signaling	1.02E00	1.97E-02	HSP90AB1,HSPA5,HSPA2
Hypoxia Signaling in the Cardiovascular System	9.93E-01	3.03E-02	P4HB,HSP90AB1
Fatty Acid Activation	9.88E-01	5.26E-02	ACSL4
Macropinocytosis Signaling	9.6E-01	2.63E-02	ITGB1,ITGB2
LPS/IL-1 Mediated Inhibition of RXR Function	9.6E-01	1.67E-02	ACSL4,GSTP1,MGST3,GSTK1
Chondroitin Sulfate Degradation (Metazoa)	9.57E-01	4.35E-02	CD44
Colanic Acid Building Blocks Biosynthesis	9.57E-01	2.78E-02	GPI
CCR5 Signaling in Macrophages	9.5E-01	2.11E-02	GNB1,FCER1G
The Visual Cycle	9.29E-01	3.57E-02	RDH11
Dermatan Sulfate Degradation (Metazoa)	9.29E-01	4.35E-02	CD44
NF-κB Activation by Viruses	9.09E-01	2.44E-02	ITGB1,ITGB2
Phospholipase C Signaling	8.98E-01	1.54E-02	ITGB1,GNB1,RALA,FCER1G
HER-2 Signaling in Breast Cancer	8.81E-01	2.5E-02	ITGB1,ITGB2
γ-linolenate Biosynthesis II (Animals)	8.78E-01	4.17E-02	ACSL4
Mitochondrial L-carnitine Shuttle Pathway	8.78E-01	4.55E-02	ACSL4
Valine Degradation I	8.55E-01	2.86E-02	HADHA
Endoplasmic Reticulum Stress Pathway	8.55E-01	5.56E-02	HSPA5
Reelin Signaling in Neurons	8.54E-01	2.44E-02	ITGB1,ITGB2
Cytotoxic T Lymphocyte-mediated Apoptosis of Target Cells	8.45E-01	2.35E-02	HLA-A,FCER1G
Prostate Cancer Signaling	8.28E-01	2.04E-02	HSP90AB1,GSTP1
Allograft Rejection Signaling	8.28E-01	2.11E-02	HLA-A,FCER1G
OX40 Signaling Pathway	8.03E-01	2.13E-02	HLA-A,FCER1G
Neuregulin Signaling	7.8E-01	1.96E-02	ITGB1,HSP90AB1
Apoptosis Signaling	7.8E-01	2.11E-02	LMNA,AIFM1
Maturity Onset Diabetes of Young (MODY) Signaling	7.75E-01	3.23E-02	GAPDH
Glucocorticoid Receptor Signaling	7.63E-01	1.36E-02	HSP90AB1,HSPA5,HSPA2,MMP1
Communication between Innate and Adaptive Immune Cells	7.57E-01	1.83E-02	HLA-A,FCER1G
CTLA4 Signaling in Cytotoxic T Lymphocytes	7.5E-01	2.04E-02	CLTC,FCER1G
Dendritic Cell Maturation	7.44E-01	1.45E-02	HLA-A,PDIA3,FCER1G
Tumoricidal Function of Hepatic Natural Killer Cells	7.41E-01	4.17E-02	AIFM1
SAPK/JNK Signaling	7.35E-01	1.96E-02	GNB1,FCER1G
Rac Signaling	6.76E-01	1.64E-02	ITGB1,CD44
Sphingosine-1-phosphate Signaling	6.39E-01	1.67E-02	PDIA3,ASAH1
Retinoate Biosynthesis I	6.3E-01	2.7E-02	RDH11
Androgen Signaling	6.28E-01	1.39E-02	GNB1,CALR
G Protein Signaling Mediated by Tubby	6.18E-01	2.38E-02	GNB1
Stearate Biosynthesis I (Animals)	6.18E-01	2.13E-02	ACSL4
Ethanol Degradation II	6.18E-01	2.33E-02	HSD17B10
Complement System	6.18E-01	2.86E-02	C5AR1
Type II Diabetes Mellitus Signaling	6.01E-01	1.24E-02	PKM,ACSL4
IL-17A Signaling in Fibroblasts	5.96E-01	2.5E-02	MMP1
Noradrenaline and Adrenaline Degradation	5.96E-01	1.92E-02	HSD17B10
14-3-3-mediated Signaling	5.95E-01	1.65E-02	PDIA3,VIM
P2Y Purigenic Receptor Signaling Pathway	5.85E-01	1.45E-02	GNB1,PDIA3
Atherosclerosis Signaling	5.8E-01	1.47E-02	ITGB2,MMP1
Gαi Signaling	5.8E-01	1.52E-02	GNB1,RALA
Role of Osteoblasts, Osteoclasts and Chondrocytes in Rheumatoid Arthritis	5.69E-01	1.26E-02	ITGB1,GSN,MMP1
PI3K/AKT Signaling	5.65E-01	1.39E-02	ITGB1,HSP90AB1
Axonal Guidance Signaling	5.52E-01	1.07E-02	ITGB1,GNB1,PFN1,PDIA3,RTN4
Neuroprotective Role of THOP1 in Alzheimer's Disease	5.47E-01	1.85E-02	HLA-A
Estrogen Receptor Signaling	5.46E-01	1.47E-02	DDX5,HNRNPD
Role of Oct4 in Mammalian Embryonic Stem Cell Pluripotency	5.04E-01	2.22E-02	PHB
Retinol Biosynthesis	4.81E-01	1.72E-02	RDH11
Hematopoiesis from Pluripotent Stem Cells	4.6E-01	1.59E-02	FCER1G
Semaphorin Signaling in Neurons	4.53E-01	1.92E-02	ITGB1
Phototransduction Pathway	4.46E-01	1.54E-02	GNB1
Role of IL-17A in Arthritis	4.4E-01	1.59E-02	MMP1
Nur77 Signaling in T Lymphocytes	4.33E-01	1.59E-02	FCER1G
Actin Nucleation by ARP-WASP Complex	4.27E-01	1.52E-02	ITGB1
Phospholipases	4.27E-01	1.52E-02	PDIA3
Regulation of Cellular Mechanics by Calpain Protease	4.27E-01	1.39E-02	ITGB1
Glutamate Receptor Signaling	4.21E-01	1.45E-02	GNB1
Serotonin Degradation	4.15E-01	1.33E-02	HSD17B10
Induction of Apoptosis by HIV1	4.1E-01	1.54E-02	SLC25A5
Cell Cycle: G1/S Checkpoint Regulation	3.98E-01	1.52E-02	RPL11
Calcium-induced T Lymphocyte Apoptosis	3.93E-01	1.43E-02	FCER1G
Antiproliferative Role of Somatostatin Receptor 2	3.88E-01	1.41E-02	GNB1
Role of NFAT in Regulation of the Immune Response	3.83E-01	1.01E-02	GNB1,FCER1G
CREB Signaling in Neurons	3.77E-01	9.85E-03	GNB1,PDIA3
RAR Activation	3.74E-01	1.06E-02	RDH11,MMP1
Ephrin Receptor Signaling	3.74E-01	9.95E-03	ITGB1,GNB1
PPARα/RXRα Activation	3.71E-01	1.05E-02	HSP90AB1,PDIA3
Mitotic Roles of Polo-Like Kinase	3.68E-01	1.43E-02	HSP90AB1
T Helper Cell Differentiation	3.58E-01	1.39E-02	FCER1G
Role of NFAT in Cardiac Hypertrophy	3.54E-01	9.66E-03	GNB1,PDIA3
Melatonin Signaling	3.53E-01	1.28E-02	PDIA3
Renal Cell Carcinoma Signaling	3.53E-01	1.35E-02	FH
IL-17 Signaling	3.44E-01	1.35E-02	TIMP1
Ephrin B Signaling	3.4E-01	1.23E-02	GNB1
Role of Macrophages, Fibroblasts and Endothelial Cells in Rheumatoid Arthritis	3.39E-01	9.04E-03	C5AR1,PDIA3,MMP1
Leptin Signaling in Obesity	3.36E-01	1.2E-02	PDIA3
Thrombin Signaling	3.3E-01	9.71E-03	GNB1,PDIA3
Nitric Oxide Signaling in the Cardiovascular System	3.19E-01	1.01E-02	HSP90AB1
Ceramide Signaling	3.15E-01	1.14E-02	CTSD
α-Adrenergic Signaling	2.9E-01	9.52E-03	GNB1
Altered T Cell and B Cell Signaling in Rheumatoid Arthritis	2.9E-01	1.09E-02	FCER1G
CDK5 Signaling	2.86E-01	1.06E-02	ITGB1
RANK Signaling in Osteoclasts	2.86E-01	1.05E-02	GSN
Bladder Cancer Signaling	2.83E-01	1.1E-02	MMP1
G Beta Gamma Signaling	2.83E-01	8.55E-03	GNB1
PAK Signaling	2.83E-01	9.43E-03	ITGB1
IL-1 Signaling	2.73E-01	9.35E-03	GNB1
PPAR Signaling	2.64E-01	9.52E-03	HSP90AB1
Systemic Lupus Erythematosus Signaling	2.61E-01	8.1E-03	HLA-A,FCER1G
Antioxidant Action of Vitamin C	2.61E-01	9.35E-03	PDIA3
Cardiac Hypertrophy Signaling	2.59E-01	8.2E-03	GNB1,PDIA3
Role of Pattern Recognition Receptors in Recognition of Bacteria and Viruses	2.58E-01	9.43E-03	C5AR1
Neuropathic Pain Signaling In Dorsal Horn Neurons	2.46E-01	9.26E-03	PDIA3
Telomerase Signaling	2.46E-01	9.71E-03	HSP90AB1
HIF1α Signaling	2.38E-01	9.26E-03	MMP1
Colorectal Cancer Metastasis Signaling	2.28E-01	7.75E-03	GNB1,MMP1
iCOS-iCOSL Signaling in T Helper Cells	2.28E-01	8.13E-03	FCER1G
Pancreatic Adenocarcinoma Signaling	2.28E-01	8.33E-03	RALA
fMLP Signaling in Neutrophils	2.25E-01	7.75E-03	GNB1
Natural Killer Cell Signaling	2.23E-01	8.62E-03	FCER1G
Fc Epsilon RI Signaling	2.23E-01	8.55E-03	FCER1G
Gαs Signaling	2.23E-01	8.26E-03	GNB1
CCR3 Signaling in Eosinophils	2.11E-01	7.87E-03	GNB1
CD28 Signaling in T Helper Cells	2.07E-01	7.58E-03	FCER1G
Hereditary Breast Cancer Signaling	2.07E-01	7.81E-03	NPM1
PKCθ Signaling in T Lymphocytes	2.07E-01	6.99E-03	FCER1G
Synaptic Long Term Potentiation	2E-01	7.75E-03	PDIA3
p70S6K Signaling	2E-01	7.75E-03	PDIA3
PTEN Signaling	2E-01	7.41E-03	ITGB1

## Sheet: Table 1
	Macrophages proteins within metabolic pathways altered in response to HIV-1 Vpr
	ID	Symbol	Fold Change	Entrez Gene Name
	P51659	HSD17B4	2.698	hydroxysteroid (17-beta) dehydrogenase 4
	P15586	GNS	2.502	glucosamine (N-acetyl)-6-sulfatase
	P62873	GNB1	1.948	guanine nucleotide binding protein (G protein), beta polypeptide 1
	Q8TC12	RDH11	1.879	retinol dehydrogenase 11 (all-trans/9-cis/11-cis)
	P09211	GSTP1	1.867	glutathione S-transferase pi 1
	Q9Y6N5	SQRDL	1.857	sulfide quinone reductase-like (yeast)
	Q02218	OGDH	1.67	oxoglutarate (alpha-ketoglutarate) dehydrogenase (lipoamide)
	Q92945	KHSRP	1.661	KH-type splicing regulatory protein
	P11413	G6PD	1.652	glucose-6-phosphate dehydrogenase
	O60488	ACSL4	1.645	acyl-CoA synthetase long-chain family member 4
	P07954	FH	1.595	fumarate hydratase
	P36957	DLST	1.588	dihydrolipoamide S-succinyltransferase
	P52789	HK2	1.528	hexokinase 2
	Q13510	ASAH1	1.521	N-acylsphingosine amidohydrolase (acid ceramidase) 1
	P14618	PKM	1.52	pyruvate kinase, muscle
	P19367	HK1	1.512	hexokinase 1
	O95831	AIFM1	-1.433	apoptosis-inducing factor, mitochondrion-associated, 1
	P30101	PDIA3	-1.448	protein disulfide isomerase family A, member 3
	O14880	MGST3	-1.539	microsomal glutathione S-transferase 3
	O95571	ETHE1	-1.553	ethylmalonic encephalopathy 1
	P09972	ALDOC	-1.554	aldolase C, fructose-bisphosphate
	Q9Y2Q3	GSTK1	-1.557	glutathione S-transferase kappa 1
	P05455	SSB	-1.601	Sjogren syndrome antigen B (autoantigen La)
	P40939	HADHA	-1.666	hydroxyacyl-CoA dehydrogenase/3-ketoacyl-CoA thiolase/enoyl-CoA hydratase
	P31040	SDHA	-1.666	succinate dehydrogenase complex, subunit A, flavoprotein (Fp)
	P04406	GAPDH	-1.673	glyceraldehyde-3-phosphate dehydrogenase
	P49448	GLUD2	-1.683	glutamate dehydrogenase 2
	P60174	TPI1	-1.78	triosephosphate isomerase 1
	P42126	ECI1	-1.796	enoyl-CoA delta isomerase 1
	Q9H3P7	ACBD3	-1.824	acyl-CoA binding domain containing 3
	P04075	ALDOA	-1.824	aldolase A, fructose-bisphosphate
	P40926	MDH2	-1.937	malate dehydrogenase 2, NAD (mitochondrial)
	P48735	IDH2	-2.209	isocitrate dehydrogenase 2 (NADP+), mitochondrial
	Q99714	HSD17B10	-2.27	hydroxysteroid (17-beta) dehydrogenase 10
	P06744	GPI	-2.31	glucose-6-phosphate isomerase
	P24752	ACAT1	-2.62	acetyl-CoA acetyltransferase 1
	P29401	TKT	-2.753	transketolase
	Q96AB3	ISOC2	-2.783	isochorismatase domain containing 2
	P54819	AK2	-3.324	adenylate kinase 2

## Sheet: Networks Table 2
ID	Top Functions	Score	Focus Molecules	Molecules in Network
1	Organ Morphology, Nucleic Acid Metabolism, Small Molecule Biochemistry	49	25	ACTB,ACTG1,Akt,Alpha actin,ASAH1,CALR,DDX5,DLST,Fc gamma receptor,G-Actin,glutathione transferase,GPI,GSN,GST,GSTK1,GSTP1,HLA-A,HNRNPD,ILF3,KHSRP,LETM1,MATR3,MGST3,MHC Class I (complex),MYH11,NONO,OGDH,PDIA3,RAB7A,Rho gdi,RTN4,TAGLN2,Tap,tyrosine kinase,USO1
2	Carbohydrate Metabolism, Energy Production, Nucleic Acid Metabolism	41	22	3-hydroxyacyl-CoA dehydrogenase,aldo,ALDOA,ALDOC,ATP synthase,Beta Tubulin,C1q,C1QBP,CHI3L1,CIRBP,CTSD,CYC1,Cytochrome bc1,cytochrome C,cytochrome-c oxidase,ERK1/2,ETFB,ETS,GAPDH,HADHA,HK1,HK2,HSD17B4,HSD17B10,HSPD1,Nuclear factor 1,OPA1,PHB,Pkg,Secretase gamma,SLC25A5,STOML2,TOMM22,VDAC1,VDAC2
3	Nucleic Acid Metabolism, Small Molecule Biochemistry, DNA Replication, Recombination, and Repair	33	20	ACTA2,Actin,adenosine-tetraphosphatase,Alpha Actinin,Alpha catenin,ATP5A1,ATP5B,ATP5D,ATP5F1,ATP6V1B2,ATPase,CaMKII,CAPG,CAPZA1,caspase,CD3,CLIC1,CLTC,F Actin,FH,G6PD,Hsp27,Lamin,Lamin b,LMNA,LMNB1,LMNB2,MDH2,Mlc,MYH9,PFN1,PI3K (complex),PLEC,Rock,VIM
4	Cancer, Gastrointestinal Disease, Hepatic System Disease	28	17	26s Proteasome,60S ribosomal subunit,AIFM1,AK2,CD44,Ck2,EEA1,estrogen receptor,HDGF,Histone h3,Histone h4,Hsp70,Hsp90,HSP,HSP90AB1,HSPA2,HSPA5,Jnk,MTDH,NPM1,P38 MAPK,PDGF BB,PKM,PP2A,Rb,RNA polymerase II,Rnr,RPL11,RPL13,RPL29,RPLP0,Sos,SSB,trypsin,UBA52
5	Developmental Disorder, Hereditary Disorder, Metabolic Disease	27	16	ACBD3,ACTBL2,ATP6V1H,C20orf24,CTSA,ECI1,ETHE1,GLUD2,GNS,GOLGB1,ISOC2,MAPKAP1,MYO1G,NAA38,NEU1,PGRMC2,PXK,SCAMP3,SHCBP1,SLC9A3R2,SNX27,SQRDL,SRGAP2,SUCLG1,TFEB,TMEM33,TOM1L1,TP53I3,UBC,UNC93B1,USP1,USP46,VAT1,WDR20,ZUFSP
6	Cellular Development, Cellular Growth and Proliferation, Tissue Morphology	18	13	ACAT1,calpain,Cathepsin,collagen,Collagen type I,Collagen type II,Collagen type III,Collagen type IV,Collagen(s),CTSB,CTSH,DYSF,Ecm,Fibrin,Fibrinogen,Filamin,FTH1,FTL,HYOU1,Iga,Integrin,Integrin alpha 2 beta 1,Integrinα,ITGAX,Laminin,LDL,Lfa-1,MMP1,NFkB (complex),P4HB,PDGF (family),PECAM1,Rab11,RRBP1,TFRC
7	Developmental Disorder, Hereditary Disorder, Metabolic Disease	15	11	ACSL4,AIFM2,BCAS3,C12orf5,COL14A1,DPH1,DSE,ETFA,ETFB,ETFDH,FAR1,FBXO11,H2AFY2,HISTONE,IDH2,KIAA1967,LIPT1,MAGEA4,MAGEA2/MAGEA2B,miR-183-5p (miRNAs w/seed AUGGCAC),MTDH,PNMAL1,RDH11,RNF144B,S100A2,SDHA,SLC27A6,SLC2A4,SQRDL,TKT,TP53,TPI1,TSSC1,UBC,ZNF121
8	Cellular Function and Maintenance, Cardiac Fibrosis, Cardiovascular Disease	12	9	Ap1,BCR (complex),CTSZ,ERK,FCER1G,Fcgr3,Ifn,IFN Beta,IgG,IgG2a,Igm,IL1,IL12 (complex),IL12 (family),Immunoglobulin,Interferon alpha,ITGB1,MAP2K1/2,MHC Class II (complex),MTORC1,NADPH oxidase,p70 S6k,Pld,RALA,Rap1,RAP2B,RPL23A,SCARB2,SERPINB2,SRC (family),STAT5a/b,SYK/ZAP,Tgf beta,TIMP1,TSH
9	Immune Cell Trafficking, Inflammatory Response, Cell-To-Cell Signaling and Interaction	7	6	AMPK,C5AR1,Calmodulin,CFHR1,Cg,chemokine,Creb,Focal adhesion kinase,FSH,GNB1,Gpcr,GPR34,GPR35,GPR65,GPR137B,Insulin,ITGAM,Itgam-Itgb2,ITGB2,Lh,Mapk,Mmp,p85 (pik3r),Pdgf (complex),Pka,Pkc(s),PLC,Proinsulin,Rac,Ras,Ras homolog,SLC25A12,TCR,TRPV2,Vegf

## Sheet: HIF1A Table  3
	Macrophages proteins altered in response to HIV-1 Vpr regulated by HIF1A
	ID	Symbol	Fold Change	Entrez Gene Name
	P11021	HSPA5	2.37991	heat shock 70kDa protein 5 (glucose-regulated protein, 78kDa)
	P02786	TFRC	1.87456	transferrin receptor (p90, CD71)
	P05107	ITGB2	1.62742	integrin, beta 2 (complement component 3 receptor 3 and 4 subunit)
	P52789	HK2	1.52825	hexokinase 2
	P07339	CTSD	1.5182	cathepsin D
	P03956	MMP1	-1.52016	matrix metallopeptidase 1 (interstitial collagenase)
	P09972	ALDOC	-1.55431	aldolase C, fructose-bisphosphate
	P04406	GAPDH	-1.67341	glyceraldehyde-3-phosphate dehydrogenase
	P60174	TPI1	-1.77996	triosephosphate isomerase 1
	P62736	ACTA2	-1.79123	actin, alpha 2, smooth muscle, aorta
	P04075	ALDOA	-1.82376	aldolase A, fructose-bisphosphate
	P06748	NPM1	-2.12297	nucleophosmin (nucleolar phosphoprotein B23, numatrin)
	P08670	VIM	-2.14628	vimentin
	P06744	GPI	-2.30988	glucose-6-phosphate isomerase

## Sheet: metabolic process
Protein AC	Protein ID	Protein Name
P06744	G6PI_HUMAN	Glucose-6-phosphate isomerase; ( Short=GPI; EC=5.3.1.9; AltName: Full=Autocrine motility factor; Short=AMF; AltName: Full=Neuroleukin; Short=NLK; AltName: Full=Phosphoglucose isomerase; Short=PGI; AltName: Full=Phosphohexose isomerase; Short=PHI; AltName: Full=Sperm antigen 36; Short=SA-36)
P04406	G3P_HUMAN	Glyceraldehyde-3-phosphate dehydrogenase; ( Short=GAPDH; EC=1.2.1.12; AltName: Full=Peptidyl-cysteine S-nitrosylase GAPDH; EC=2.6.99.-)
P07954	FUMH_HUMAN	Fumarate hydratase, mitochondrial precursor; ( Short=Fumarase; EC=4.2.1.2)
O95571	ETHE1_HUMAN	Protein ETHE1, mitochondrial precursor; ( EC=3.-.-.-; AltName: Full=Ethylmalonic encephalopathy protein 1; AltName: Full=Hepatoma subtracted clone one protein)
P08574	CY1_HUMAN	Cytochrome c1, heme protein, mitochondrial precursor; (AltName: Full=Complex III subunit 4; AltName: Full=Complex III subunit IV; AltName: Full=Cytochrome b-c1 complex subunit 4; AltName: Full=Ubiquinol-cytochrome-c reductase complex cytochrome c1 subunit; Short=Cytochrome c-1)
O75746	CMC1_HUMAN	Calcium-binding mitochondrial carrier protein Aralar1; (AltName: Full=Mitochondrial aspartate glutamate carrier 1; AltName: Full=Solute carrier family 25 member 12)
P09668	CATH_HUMAN	Pro-cathepsin H precursor; (Contains: RecName: Full=Cathepsin H mini chain; Contains: RecName: Full=Cathepsin H; EC=3.4.22.16; Contains: RecName: Full=Cathepsin H heavy chain; Contains: RecName: Full=Cathepsin H light chain)
P07858	CATB_HUMAN	Cathepsin B precursor; ( EC=3.4.22.1; AltName: Full=APP secretase; Short=APPS; AltName: Full=Cathepsin B1; Contains: RecName: Full=Cathepsin B light chain; Contains: RecName: Full=Cathepsin B heavy chain)
P06576	ATPB_HUMAN	ATP synthase subunit beta, mitochondrial precursor; ( EC=3.6.3.14)
P09972	ALDOC_HUMAN	Fructose-bisphosphate aldolase C; ( EC=4.1.2.13; AltName: Full=Brain-type aldolase)
P04075	ALDOA_HUMAN	Fructose-bisphosphate aldolase A; ( EC=4.1.2.13; AltName: Full=Lung cancer antigen NY-LU-1; AltName: Full=Muscle-type aldolase)
O95831	AIFM1_HUMAN	Apoptosis-inducing factor 1, mitochondrial precursor; ( EC=1.-.-.-; AltName: Full=Programmed cell death protein 8)
P05141	ADT2_HUMAN	ADP/ATP translocase 2; (AltName: Full=ADP,ATP carrier protein 2; AltName: Full=ADP,ATP carrier protein, fibroblast isoform; AltName: Full=Adenine nucleotide translocator 2; Short=ANT 2; AltName: Full=Solute carrier family 25 member 5)
O60488	ACSL4_HUMAN	Long-chain-fatty-acid--CoA ligase 4; ( EC=6.2.1.3; AltName: Full=Long-chain acyl-CoA synthetase 4; Short=LACS 4)
P05120	PAI2_HUMAN	Plasminogen activator inhibitor 2 precursor; ( Short=PAI-2; AltName: Full=Monocyte Arg-serpin; AltName: Full=Placental plasminogen activator inhibitor; AltName: Full=Serpin B2; AltName: Full=Urokinase inhibitor)
P03956	MMP1_HUMAN	Interstitial collagenase precursor; ( EC=3.4.24.7; AltName: Full=Fibroblast collagenase; AltName: Full=Matrix metalloproteinase-1; Short=MMP-1; Contains: RecName: Full=22 kDa interstitial collagenase; Contains: RecName: Full=27 kDa interstitial collagenase)
O14880	MGST3_HUMAN	Microsomal glutathione S-transferase 3; ( Short=Microsomal GST-3; EC=2.5.1.18; AltName: Full=Microsomal GST-III)
P09211	GSTP1_HUMAN	Glutathione S-transferase P; ( EC=2.5.1.18; AltName: Full=GST class-pi; AltName: Full=GSTP1-1)
P10619	PPGB_HUMAN	Lysosomal protective protein precursor; ( EC=3.4.16.5; AltName: Full=Carboxypeptidase C; AltName: Full=Carboxypeptidase L; AltName: Full=Cathepsin A; AltName: Full=Protective protein cathepsin A; Short=PPCA; AltName: Full=Protective protein for beta-galactosidase; Contains: RecName: Full=Lysosomal protective protein 32 kDa chain; Contains: RecName: Full=Lysosomal protective protein 20 kDa chain)
P07237	PDIA1_HUMAN	Protein disulfide-isomerase precursor; ( Short=PDI; EC=5.3.4.1; AltName: Full=Cellular thyroid hormone-binding protein; AltName: Full=Prolyl 4-hydroxylase subunit beta; AltName: Full=p55)
P01033	TIMP1_HUMAN	Metalloproteinase inhibitor 1 precursor; (AltName: Full=Erythroid-potentiating activity; Short=EPA; AltName: Full=Fibroblast collagenase inhibitor; Short=Collagenase inhibitor; AltName: Full=Tissue inhibitor of metalloproteinases 1; Short=TIMP-1)
P11413	G6PD_HUMAN	Glucose-6-phosphate 1-dehydrogenase; ( Short=G6PD; EC=1.1.1.49)
P38117	ETFB_HUMAN	Electron transfer flavoprotein subunit beta; ( Short=Beta-ETF)
P13804	ETFA_HUMAN	Electron transfer flavoprotein subunit alpha, mitochondrial precursor; ( Short=Alpha-ETF)
P42126	ECI1_HUMAN	Enoyl-CoA delta isomerase 1, mitochondrial precursor; ( EC=5.3.3.8; AltName: Full=3,2-trans-enoyl-CoA isomerase; AltName: Full=Delta(3),Delta(2)-enoyl-CoA isomerase; Short=D3,D2-enoyl-CoA isomerase; AltName: Full=Dodecenoyl-CoA isomerase)
P40939	ECHA_HUMAN	Trifunctional enzyme subunit alpha, mitochondrial precursor; (AltName: Full=78 kDa gastrin-binding protein; AltName: Full=TP-alpha; Includes: RecName: Full=Long-chain enoyl-CoA hydratase; EC=4.2.1.17; Includes: RecName: Full=Long chain 3-hydroxyacyl-CoA dehydrogenase; EC=1.1.1.211)
P31040	DHSA_HUMAN	Succinate dehydrogenase [ubiquinone] flavoprotein subunit, mitochondrial precursor; ( EC=1.3.5.1; AltName: Full=Flavoprotein subunit of complex II; Short=Fp)
P51659	DHB4_HUMAN	Peroxisomal multifunctional enzyme type 2; ( Short=MFE-2; AltName: Full=17-beta-hydroxysteroid dehydrogenase 4; Short=17-beta-HSD 4; AltName: Full=D-bifunctional protein; Short=DBP; AltName: Full=Multifunctional protein 2; Short=MPF-2; Contains: RecName: Full=(3R)-hydroxyacyl-CoA dehydrogenase; EC=1.1.1.n12; Contains: RecName: Full=Enoyl-CoA hydratase 2; EC=4.2.1.107; EC=4.2.1.119; AltName: Full=…
P10809	CH60_HUMAN	60 kDa heat shock protein, mitochondrial precursor; (AltName: Full=60 kDa chaperonin; AltName: Full=Chaperonin 60; Short=CPN60; AltName: Full=Heat shock protein 60; Short=HSP-60; Short=Hsp60; AltName: Full=HuCHA60; AltName: Full=Mitochondrial matrix protein P1; AltName: Full=P60 lymphocyte protein)
P16070	CD44_HUMAN	CD44 antigen precursor; (AltName: Full=CDw44; AltName: Full=Epican; AltName: Full=Extracellular matrix receptor III; Short=ECMR-III; AltName: Full=GP90 lymphocyte homing/adhesion receptor; AltName: Full=HUTCH-I; AltName: Full=Heparan sulfate proteoglycan; AltName: Full=Hermes antigen; AltName: Full=Hyaluronate receptor; AltName: Full=Phagocytic glycoprotein 1; Short=PGP-1; AltName: Full=Phagocyti…
P21730	C5AR_HUMAN	C5a anaphylatoxin chemotactic receptor; ( Short=C5a-R; Short=C5aR; AltName: CD_antigen=CD88)
P30049	ATPD_HUMAN	ATP synthase subunit delta, mitochondrial precursor; (AltName: Full=F-ATPase delta subunit)
P25705	ATPA_HUMAN	ATP synthase subunit alpha, mitochondrial precursor
P24539	AT5F1_HUMAN	ATP synthase subunit b, mitochondrial precursor; ( Short=ATPase subunit b)
P36957	ODO2_HUMAN	Dihydrolipoyllysine-residue succinyltransferase component of 2-oxoglutarate dehydrogenase complex, mitochondrial precursor; ( EC=2.3.1.61; AltName: Full=2-oxoglutarate dehydrogenase complex component E2; Short=OGDC-E2; AltName: Full=Dihydrolipoamide succinyltransferase component of 2-oxoglutarate dehydrogenase complex; AltName: Full=E2K)
P40926	MDHM_HUMAN	Malate dehydrogenase, mitochondrial precursor; ( EC=1.1.1.37)
P14618	KPYM_HUMAN	Pyruvate kinase isozymes M1/M2; ( EC=2.7.1.40; AltName: Full=Cytosolic thyroid hormone-binding protein; Short=CTHBP; AltName: Full=Opa-interacting protein 3; Short=OIP-3; AltName: Full=Pyruvate kinase 2/3; AltName: Full=Pyruvate kinase muscle isozyme; AltName: Full=Thyroid hormone-binding protein 1; Short=THBP1; AltName: Full=Tumor M2-PK; AltName: Full=p58)
P48735	IDHP_HUMAN	Isocitrate dehydrogenase [NADP], mitochondrial precursor; ( Short=IDH; EC=1.1.1.42; AltName: Full=ICD-M; AltName: Full=IDP; AltName: Full=NADP(+)-specific ICDH; AltName: Full=Oxalosuccinate decarboxylase)
P19367	HXK1_HUMAN	Hexokinase-1; ( EC=2.7.1.1; AltName: Full=Brain form hexokinase; AltName: Full=Hexokinase type I; Short=HK I)
P15586	GNS_HUMAN	N-acetylglucosamine-6-sulfatase precursor; ( EC=3.1.6.14; AltName: Full=Glucosamine-6-sulfatase; Short=G6S)
P29401	TKT_HUMAN	Transketolase; ( Short=TK; EC=2.2.1.1)
P24752	THIL_HUMAN	Acetyl-CoA acetyltransferase, mitochondrial precursor; ( EC=2.3.1.9; AltName: Full=Acetoacetyl-CoA thiolase; AltName: Full=T2)
P62873	GBB1_HUMAN	Guanine nucleotide-binding protein G(I)/G(S)/G(T) subunit beta-1; (AltName: Full=Transducin beta chain 1)
Q13510	ASAH1_HUMAN	Acid ceramidase precursor; ( Short=AC; Short=ACDase; Short=Acid CDase; EC=3.5.1.23; AltName: Full=Acylsphingosine deacylase; AltName: Full=N-acylsphingosine amidohydrolase; AltName: Full=Putative 32 kDa heart protein; Short=PHP32; Contains: RecName: Full=Acid ceramidase subunit alpha; Contains: RecName: Full=Acid ceramidase subunit beta)
Q02218	ODO1_HUMAN	2-oxoglutarate dehydrogenase, mitochondrial precursor; ( EC=1.2.4.2; AltName: Full=2-oxoglutarate dehydrogenase complex component E1; Short=OGDC-E1; AltName: Full=Alpha-ketoglutarate dehydrogenase)
P54819	KAD2_HUMAN	Adenylate kinase 2, mitochondrial; ( Short=AK 2; EC=2.7.4.3; AltName: Full=ATP-AMP transphosphorylase 2)
Q8N163	K1967_HUMAN	DBIRD complex subunit KIAA1967; (AltName: Full=Deleted in breast cancer gene 1 protein; Short=DBC-1; Short=DBC.1; AltName: Full=p30 DBC)
Q96AB3	ISOC2_HUMAN	Isochorismatase domain-containing protein 2, mitochondrial precursor
P52789	HXK2_HUMAN	Hexokinase-2; ( EC=2.7.1.1; AltName: Full=Hexokinase type II; Short=HK II; AltName: Full=Muscle form hexokinase)
Q99714	HCD2_HUMAN	3-hydroxyacyl-CoA dehydrogenase type-2; ( EC=1.1.1.35; AltName: Full=17-beta-hydroxysteroid dehydrogenase 10; Short=17-beta-HSD 10; AltName: Full=3-hydroxy-2-methylbutyryl-CoA dehydrogenase; EC=1.1.1.178; AltName: Full=3-hydroxyacyl-CoA dehydrogenase type II; AltName: Full=Endoplasmic reticulum-associated amyloid beta-peptide-binding protein; AltName: Full=Mitochondrial ribonuclease P protein 2; …
P53597	SUCA_HUMAN	Succinyl-CoA ligase [ADP/GDP-forming] subunit alpha, mitochondrial precursor; ( EC=6.2.1.4; EC=6.2.1.5; AltName: Full=Succinyl-CoA synthetase subunit alpha; Short=SCS-alpha)
Q9Y6N5	SQRD_HUMAN	Sulfide:quinone oxidoreductase, mitochondrial precursor; ( EC=1.-.-.-)
Q8TC12	RDH11_HUMAN	Retinol dehydrogenase 11; ( EC=1.1.1.300; AltName: Full=Androgen-regulated short-chain dehydrogenase/reductase 1; AltName: Full=HCV core-binding protein HCBP12; AltName: Full=Prostate short-chain dehydrogenase/reductase 1; AltName: Full=Retinal reductase 1; Short=RalR1)
P60174	TPIS_HUMAN	Triosephosphate isomerase; ( Short=TIM; EC=5.3.1.1; AltName: Full=Triose-phosphate isomerase)

## Sheet: Upstream Regulators
Upstream Regulator	Molecule Type	Predicted Activation State	Activation z-score	p-value of overlap	Target molecules in dataset
MYC	transcription regulator	Inhibited	-2.948	5.23E-18	ACAT1,ACSL4,ACTB,AK2,ALDOA,C1QBP,CD44,CTSB,CTSD,DDX5,FTH1,GAPDH,GPI,HK2,HLA-A,HNRNPD,HSPD1,IDH2,ITGAM,ITGAX,ITGB1,MGST3,NPM1,PHB,PKM,RPL13,SLC25A5,SQRDL,TAGLN2,TFRC,TIMP1,TKT,TPI1,VDAC2
MYCN	transcription regulator	Inhibited	-2.076	1.70E-16	ACTB,ACTG1,ALDOA,GAPDH,HK2,HLA-A,HSP90AB1,HSPD1,ITGB1,MYH9,NPM1,PGRMC2,PHB,RPL11,RPL13,RPL23A,RPL29,RPLP0,TPI1,VIM
mono-(2-ethylhexyl)phthalate	chemical toxicant		-1.739	6.07E-16	ACSL4,ALDOC,ATP5B,ATP5D,ATP5F1,CYC1,FH,G6PD,GPI,HADHA,HK2,MDH2,OGDH,SDHA,SUCLG1,TKT,TPI1
APP	other		0.287	3.68E-14	ACTA2,ACTB,ACTG1,AIFM1,ALDOA,ALDOC,ATP5A1,ATP5B,ATP5D,C1QBP,CALR,CD44,CLIC1,CLTC,CTSB,CTSD,GNB1,GPI,GSTP1,HK1,HSP90AB1,HSPA5,HSPD1,ITGAM,MMP1,SUCLG1,TPI1,VDAC1
CD 437	chemical drug	Activated	3.153	5.48E-14	AK2,ALDOA,ATP5A1,ATP5B,CLIC1,FTH1,FTL,HADHA,NPM1,PDIA3,PFN1,RPL11,RPL13,SLC25A5,STOML2,UBA52,VDAC2
INSR	kinase	Inhibited	-2.227	1.13E-11	ACSL4,ATP5A1,ATP5B,ATP5D,CTSB,CYC1,ECI1,ETFA,ETFB,FH,GNB1,HADHA,HSD17B10,HSD17B4,HSPD1,MDH2,OGDH,RAB7A
D-glucose	chemical - endogenous mammalian		0.562	2.03E-11	ACTA2,ACTB,CALR,CTSB,G6PD,GAPDH,HK1,HK2,HSPA5,HSPD1,ITGB1,MDH2,MMP1,PDIA3,PHB,SLC25A5,TFRC,TIMP1,TKT,UBA52
TP53	transcription regulator		-1.470	2.13E-11	ACAT1,ACTA2,ACTB,CD44,CTSB,CTSD,CTSH,ETFA,G6PD,GAPDH,GPI,GSN,GSTP1,HADHA,HK2,HSP90AB1,HSPD1,IDH2,MDH2,MMP1,MTDH,MYH9,NPM1,P4HB,PECAM1,PFN1,SERPINB2,SQRDL,SUCLG1,TAGLN2,USO1,VIM
tretinoin	chemical - endogenous mammalian		1.951	5.36E-11	ATP6V1B2,C5AR1,CALR,CLTC,CTSB,CTSD,FCER1G,GSTP1,HADHA,HDGF,HK1,HNRNPD,HSPA2,HSPD1,ILF3,ITGAM,ITGAX,ITGB1,ITGB2,MGST3,MMP1,MYH9,NPM1,PFN1,RALA,RPL11,RPL13,RPL29,SERPINB2,TFRC,TIMP1,TPI1,VIM
TGFB1	growth factor		-0.622	7.15E-10	ACTA2,CD44,CHI3L1,CTSB,CTSD,CTSH,CYC1,DDX5,FCER1G,FTH1,FTL,GNS,GSN,HDGF,HSD17B10,HSPA5,ITGAM,ITGAX,ITGB1,ITGB2,MMP1,MYH11,MYH9,PECAM1,PGRMC2,RDH11,SERPINB2,STOML2,TFRC,TIMP1,USO1,VAT1,VDAC2,VIM
PSEN1	peptidase			7.48E-10	ACTB,ACTG1,ALDOA,ATP5A1,ATP5B,ATP5D,C1QBP,CLTC,CTSZ,GNB1,GSTP1,HK1,HSPA5,HSPD1,SUCLG1,TPI1,VDAC1
PDGF (family)	group		-0.447	7.88E-10	CALR,HSPD1,P4HB,PDIA3,VIM
FOS	transcription regulator		0.798	8.98E-10	ACTG1,CD44,CHI3L1,CTSB,CTSH,EEA1,FTH1,GSTP1,HSD17B10,HSPA5,ITGB1,MMP1,MYH9,PFN1,RPLP0,SERPINB2,TIMP1,UBA52,VIM
MAPT	other			1.06E-09	ACTG1,ALDOA,ATP5A1,ATP5B,ATP5D,C1QBP,CLTC,GSTP1,HK1,HSPA5,HSPD1,SUCLG1,TPI1,VDAC1
BID	other	Activated	2.449	1.10E-09	C5AR1,CTSB,CTSD,CTSH,ITGAX,TIMP1
sirolimus	chemical drug		1.565	1.12E-09	ACTA2,ACTB,CLIC1,G6PD,GSTP1,HSP90AB1,HSPA5,HSPD1,MMP1,MYH11,NPM1,RPL29,RPLP0,SLC25A5,TPI1,UBA52,VIM
phorbol myristate acetate	chemical drug	Activated	2.917	4.23E-09	ACSL4,ACTB,C5AR1,CAPG,CD44,CTSD,FCER1G,FTH1,GSTP1,HSP90AB1,HSPA5,ILF3,ITGAM,ITGAX,ITGB1,ITGB2,MMP1,MYH9,NPM1,PECAM1,PKM,SERPINB2,SSB,TIMP1,VIM
APOE	transporter		-1.255	9.96E-09	ACAT1,ACTA2,ACTB,C5AR1,CALR,CD44,CTSB,CTSD,HSP90AB1,HSPD1,ITGAM,TIMP1
SP1	transcription regulator		0.309	1.64E-08	ACTA2,ATP5B,C1QBP,CHI3L1,CTSD,CYC1,HADHA,HK2,HSPA5,ITGAM,ITGAX,MMP1,MYH11,PKM,SLC25A5,TIMP1,VIM
PD98059	chemical - kinase inhibitor		-1.089	1.72E-08	ACTA2,ALDOA,CD44,CTSB,CTSH,FTH1,GPI,HSPA5,HYOU1,ITGAM,ITGAX,ITGB2,MMP1,MYH11,PLEC,SERPINB2,TIMP1,VIM
HIF1A	transcription regulator		-0.952	1.81E-08	ACTA2,ALDOA,ALDOC,CTSD,GAPDH,GPI,HK2,HSPA5,ITGB2,MMP1,NPM1,TFRC,TPI1,VIM
1,2-dithiol-3-thione	chemical reagent		-0.051	2.17E-08	ACTG1,ALDOA,CTSD,FTH1,GSTP1,HSP90AB1,LMNA,PDIA3,RPLP0,TFRC,TPI1,USO1
IFNG	cytokine	Activated	2.446	2.19E-08	ACTB,C5AR1,CD44,CIRBP,CTSB,CTSD,CTSH,CTSZ,DDX5,FCER1G,FTH1,FTL,HK2,HLA-A,HSD17B4,HSP90AB1,HSPD1,ITGAM,ITGB1,ITGB2,MMP1,MYH9,PECAM1,RAP2B,RPL23A,TFRC,TIMP1
dexamethasone	chemical drug		0.717	2.30E-08	ACAT1,ACTA2,ACTB,ACTG1,ATP6V1B2,C5AR1,CD44,CHI3L1,CLIC1,CTSB,CTSD,ETFA,FTH1,FTL,G6PD,GAPDH,GNS,GSTP1,HSPA5,ILF3,ITGAM,ITGB1,KHSRP,MMP1,NPM1,PGRMC2,PLEC,RPLP0,SCARB2,SERPINB2,TIMP1
HNF4A	transcription regulator		1.387	2.64E-08	ACAT1,ACTA2,AK2,ASAH1,CHI3L1,CTSA,CTSB,CTSZ,DLST,FH,G6PD,GNS,GSN,GSTK1,HADHA,HSD17B4,HSPA5,ISOC2,MDH2,MGST3,NONO,OGDH,OPA1,PHB,PKM,RAB7A,RDH11,SLC25A5,SQRDL,STOML2,SUCLG1,TAGLN2,TMEM33,USO1,VDAC1,VDAC2
5-fluorouracil	chemical drug	Activated	2.331	2.82E-08	ALDOA,ATP5B,ATP5F1,GAPDH,GSN,HADHA,HSP90AB1,IDH2,RPL11,SLC25A5,SSB,TPI1
UDP-D-glucose	chemical - endogenous mammalian		-1.000	3.18E-08	CALR,HSPA5,HYOU1,PDIA3
HTT	transcription regulator			6.58E-08	ACTA2,ALDOA,ALDOC,ATP5A1,ATP5B,CTSD,CYC1,DLST,ECI1,GPI,GSN,HSP90AB1,HSPA5,HSPD1,ITGB1,MDH2,PFN1,SDHA,TFRC,TPI1
lactacystin	chemical - protease inhibitor		-1.095	8.75E-08	ACTB,AK2,CLIC1,CTSD,FTL,GSTP1,HLA-A,HSPA5,MMP1,PFN1,RPLP0
gentamicin	chemical drug		1.155	9.56E-08	CALR,CAPZA1,CTSD,HSD17B4,HSPA5,HYOU1,MYO1G,NPM1,SSB,TFRC,TIMP1,VAT1
dihydrotestosterone	chemical - endogenous mammalian		1.000	1.30E-07	ACTB,ALDOA,CHI3L1,DDX5,FTH1,FTL,GPI,GSN,GSTP1,HK2,ITGB1,MMP1,PFN1,PHB,TKT,VIM
beta-estradiol	chemical - endogenous mammalian		-0.859	1.32E-07	ACTA2,ACTB,ALDOA,ATP5F1,CD44,CHI3L1,CTSB,CTSD,CTSH,G6PD,GNB1,GNS,GSTP1,HDGF,HNRNPD,HSD17B4,HSP90AB1,HSPA5,HSPD1,IDH2,ILF3,ITGB2,LMNA,MMP1,NPM1,PDIA3,RALA,SLC25A12,TPI1,VIM
lipopolysaccharide	chemical drug	Activated	2.888	1.50E-07	C5AR1,CALR,CD44,CHI3L1,CTSB,FCER1G,FTH1,G6PD,GSN,GSTP1,HDGF,HK2,HLA-A,HSPA5,HYOU1,ITGAM,ITGAX,ITGB1,ITGB2,LMNB1,MMP1,MYH9,P4HB,PDIA3,PECAM1,SERPINB2,TFRC,TIMP1,TKT,VIM
HRAS	enzyme		-0.220	2.49E-07	ACTB,ACTG1,ATP5B,CAPG,CD44,CTSB,CTSZ,GSN,ITGAM,ITGB1,MMP1,P4HB,PFN1,RTN4,SDHA,SERPINB2,VIM
NFE2L2	transcription regulator		-0.462	2.73E-07	ACTG1,ALDOA,CTSD,FTH1,FTL,G6PD,GSTP1,HSP90AB1,LMNA,MGST3,PDIA3,RPLP0,TPI1,USO1
FTMT	enzyme			3.19E-07	FTH1,FTL,TFRC
CD3	complex		1.365	3.40E-07	CD44,CYC1,FCER1G,FTL,G6PD,GAPDH,HSPA5,MDH2,NPM1,OGDH,P4HB,PFN1,PHB,PLEC,SLC25A5,SSB,TFRC,VDAC2
IL3	cytokine		1.948	3.58E-07	CALR,HDGF,HK1,HK2,HSPA2,HSPA5,ITGAM,ITGAX,RALA,RPL11,RPL13,RPL29,SERPINB2
ACO1	enzyme			6.81E-07	FTH1,FTL,GAPDH,TFRC
IL2	cytokine		0.141	7.64E-07	CD44,DLST,FCER1G,GAPDH,HK2,HSPA5,HSPD1,ITGB1,PDIA3,PECAM1,PHB,TIMP1,TPI1,VDAC1,VIM
ESRRA	ligand-dependent nuclear receptor		-0.076	7.71E-07	ALDOA,ALDOC,ASAH1,ATP5B,ATP5F1,CYC1,HADHA,HK1,HSD17B4
methylprednisolone	chemical drug		-0.523	7.87E-07	ASAH1,C1QBP,CD44,CTSH,CYC1,GSTK1,GSTP1,HSD17B10,IDH2,ITGB1,MMP1,MTDH,MYO1G,NPM1,TFRC,VIM
tert-butyl-hydroquinone	chemical reagent		1.732	9.20E-07	FTH1,FTL,G6PD,GSTP1,HSPA5,ITGAM,MYH11
ANGPT2	growth factor		-0.104	1.06E-06	CALR,HSPA2,HSPA5,HSPD1,MMP1,P4HB,PDIA3,VIM
IGF1R	transmembrane receptor		-0.707	1.10E-06	ACTA2,ALDOA,ATP5A1,ATP5B,ATP5D,CAPG,FTH1,HADHA,HSPA5,ITGAM
benzyloxycarbonyl-Leu-Leu-Leu aldehyde	chemical - protease inhibitor		0.011	1.50E-06	ACTB,AK2,CLIC1,CTSB,GSTP1,HSPA5,HSPD1,ITGB1,MMP1,PFN1,RPLP0
TNF	cytokine		-0.155	1.70E-06	ACTB,AK2,C5AR1,CALR,CD44,CHI3L1,CTSB,CTSZ,DDX5,FCER1G,FTH1,GSTP1,HK2,HSP90AB1,HSPD1,IDH2,ITGAM,ITGB1,ITGB2,MMP1,MYH9,P4HB,PECAM1,SERPINB2,TFRC,TIMP1,VIM
pirinixic acid	chemical toxicant		-0.948	1.73E-06	ACAT1,ACSL4,ALDOC,ECI1,FCER1G,G6PD,GAPDH,HADHA,HSD17B10,HSD17B4,HSPD1,ITGAM,MGST3,RTN4
phosphate	chemical - endogenous mammalian		0.378	1.97E-06	ACAT1,CYC1,HK2,NPM1,PLEC,SLC25A5,TIMP1
nitrofurantoin	chemical drug		0.426	2.25E-06	ACTB,ACTG1,CTSB,GSTP1,HSD17B4,HSPA5,ITGB1,RPL13,TIMP1
PLN	transporter			2.58E-06	ACTB,ALDOA,ITGB1,RALA,TPI1,VIM
PLAUR	transmembrane receptor		1.104	2.91E-06	C5AR1,CTSB,ITGAM,ITGB1,VIM
SREBF1	transcription regulator		1.091	3.01E-06	ACSL4,ALDOC,ETHE1,G6PD,HK2,HSPA5,RDH11,RPLP0,SUCLG1
HAS2	enzyme			3.15E-06	ACTA2,CD44,TIMP1
ABCB7	transporter			3.15E-06	FTH1,FTL,TFRC
EDN1	cytokine		-0.648	3.31E-06	ACTA2,ACTB,HSPA5,ITGAM,ITGB1,MMP1,NPM1,SERPINB2,VIM
SMARCA4	transcription regulator		1.114	3.99E-06	ACTA2,CD44,CTSB,CTSH,DYSF,GAPDH,GSTP1,ITGB1,LMNA,MMP1,MYH11
APC	enzyme			4.79E-06	CD44,FH,HK2,MDH2,OGDH,SUCLG1,TIMP1
acetaminophen	chemical drug		0.263	5.39E-06	ACTB,ACTG1,GSTP1,HSD17B4,HSPA5,HSPD1,ITGB1,PECAM1
CTNNB1	transcription regulator			6.72E-06	ACTA2,ACTB,CD44,CTSZ,FCER1G,HDGF,ILF3,ITGB1,ITGB2,LMNA,MMP1,PFN1,TIMP1,USO1
PRL	cytokine		0.551	1.03E-05	ACTB,CTSA,CTSB,CTSD,CTSH,HSPD1,P4HB,TIMP1,VIM
MAP2K1	kinase		0.980	1.20E-05	ACTA2,CD44,CTSB,HSPA5,ITGB1,MMP1,PECAM1,RAP2B
cisplatin	chemical drug		-0.183	1.32E-05	ACTA2,ACTB,AIFM1,CD44,CTSB,G6PD,GSTP1,HADHA,HK1,HK2,HSPA5,ITGB1,LMNA,TIMP1,VIM
ESR2	ligand-dependent nuclear receptor		-0.510	1.39E-05	CTSD,GSTP1,ITGB1,LMNA,MMP1,PLEC,TIMP1
IREB2	translation regulator			1.74E-05	FTH1,FTL,TFRC
6-hydroxydopamine	chemical toxicant		0.896	1.75E-05	CALR,HSP90AB1,HSPA5,P4HB,PDIA3,RPL29
VEGFA	growth factor		-0.718	1.90E-05	CTSB,ETFA,HK1,ITGB1,LMNA,MDH2,MMP1,SLC25A5,TOMM22
PPARA	ligand-dependent nuclear receptor		-1.372	2.02E-05	ACAT1,ATP5B,ECI1,ETHE1,G6PD,GSTK1,GSTP1,HADHA,HSD17B10,HSD17B4,MGST3,RTN4
FOSB	transcription regulator			2.05E-05	FTH1,MMP1,SERPINB2,TIMP1
15-deoxy-delta-12,14 -PGJ 2	chemical - endogenous non-mammalian	Activated	2.765	2.15E-05	ACTA2,CTSD,FTH1,GSN,GSTP1,ITGAM,MMP1,MYH11
IL4	cytokine		0.575	2.25E-05	ACTA2,ALDOC,C5AR1,CAPG,CD44,EEA1,FCER1G,HK2,ITGAX,ITGB1,ITGB2,MMP1,MTDH,PHB,TIMP1,VIM
butyric acid	chemical - endogenous mammalian		1.178	2.34E-05	FTH1,GSN,GSTP1,HDGF,HK1,ITGAM,NPM1,PDIA3,PGRMC2,PHB,SERPINB2,TIMP1
HBB	transporter			2.37E-05	CD44,FTH1,FTL,PECAM1,TFRC
cholesterol	chemical - endogenous mammalian		1.254	2.45E-05	ACTA2,HSPA5,ITGAM,ITGAX,MMP1,MYH11,RDH11,TIMP1
progesterone	chemical - endogenous mammalian		1.044	2.66E-05	ACAT1,ACTA2,ACTB,ATP6V1B2,C5AR1,FTH1,G6PD,HSD17B4,IDH2,ITGB1,MMP1,TIMP1,VIM
ethanol	chemical - endogenous mammalian		1.424	3.21E-05	ACTA2,C5AR1,HSD17B10,HSP90AB1,HSPA5,ITGAM,ITGAX,MGST3,PHB,TIMP1
phorbol esters	chemical - other		1.387	3.24E-05	CD44,HK2,HSD17B4,ITGAM,MMP1,TIMP1
THBS4	other		1.976	3.33E-05	CALR,HSPA5,HYOU1,P4HB
desmopressin	biologic drug			3.68E-05	ACTB,CAPG,CTSD,GAPDH,LMNA,VDAC1
SMPD1	enzyme			3.69E-05	ACTA2,CTSB,MMP1
FTH1	enzyme			3.69E-05	FTH1,FTL,TFRC
tetrathiomolybdate	chemical drug			3.69E-05	ACTA2,ITGAM,TIMP1
KRAS	enzyme		0.606	3.82E-05	ALDOA,CD44,FTH1,G6PD,GSN,HSPA5,HYOU1,PDIA3,RAB7A,VIM
TFEB	transcription regulator		1.987	3.86E-05	CTSA,CTSB,CTSD,GNS
wortmannin	chemical - kinase inhibitor		-0.216	4.63E-05	ACTA2,CD44,GSTP1,ITGAM,MYH11,TFRC,TPI1,VIM
NUBP1	other			4.70E-05	FTH1,TFRC
FTL	enzyme			4.70E-05	FTH1,TFRC
GPR34	G-protein coupled receptor			4.70E-05	ITGAM,ITGB2
ZNF410	other			4.70E-05	MMP1,SERPINB2
cation	chemical - other			4.70E-05	GSTP1,ITGB2
tyrphostin AG 1295	chemical - kinase inhibitor			4.70E-05	ACTA2,MYH11
LEP	growth factor		-1.075	4.78E-05	ACAT1,ASAH1,ATP5A1,ATP5F1,HSPA5,ITGAM,MMP1,PECAM1,SLC25A5,TIMP1,VIM
vatalanib	chemical drug			5.05E-05	ACTA2,PECAM1,TIMP1
JUN	transcription regulator		-0.198	5.53E-05	CD44,CHI3L1,FTH1,GSTP1,ITGAM,ITGB1,LMNA,MMP1,SERPINB2,TIMP1,VIM
IL1B	cytokine		0.598	5.73E-05	ACTA2,CD44,CHI3L1,CTSB,CTSZ,DDX5,G6PD,HK2,ITGAM,ITGB1,MMP1,MYH11,P4HB,SERPINB2,TIMP1,VIM
Ins1	other		0.948	6.28E-05	ACTB,ECI1,G6PD,GAPDH,GSTP1,HK2,HSD17B4,MMP1,TIMP1,VIM
STAT3	transcription regulator		1.085	6.38E-05	C5AR1,CHI3L1,CTSB,FCER1G,HK2,ITGAM,ITGB2,PECAM1,PHB,TIMP1,VIM
RLN2	other			6.70E-05	ACTA2,MMP1,TIMP1
PI3K (complex)	complex	Activated	2.184	6.72E-05	CTSD,G6PD,GSTP1,HK1,HK2,ITGAM,ITGB1,ITGB2,MMP1
carbon tetrachloride	chemical toxicant		0.528	6.93E-05	ACTA2,GSTK1,GSTP1,HDGF,HSPD1,ITGB1,PECAM1,TIMP1
heparin	chemical - endogenous mammalian		-0.659	7.31E-05	ACTA2,ATP5A1,MMP1,SDHA,VIM
MKL1	transcription regulator		-0.038	7.44E-05	ACTA2,ACTB,ITGB1,MYH11,MYH9,SERPINB2
niacinamide	chemical - endogenous mammalian		1.067	7.51E-05	ACTA2,G6PD,GAPDH,ITGAM
PLAU	peptidase		-0.793	7.51E-05	C5AR1,HSPA5,MMP1,VIM
cyclosporin A	biologic drug		1.977	8.42E-05	ACTA2,AIFM1,CD44,HSPA5,HSPD1,MDH2,MMP1,MYH11,TIMP1,VDAC2,VIM
Collagen type I	complex		-1.074	8.49E-05	ACTA2,HDGF,ITGB1,MMP1,VIM
nitric oxide	chemical - endogenous mammalian		1.067	8.82E-05	CD44,CTSH,FTH1,GSTP1,HSP90AB1,PECAM1,TFRC
CSF3	cytokine		1.725	9.58E-05	CAPG,CD44,CTSD,HSPD1,ITGAM,ITGB2,TFRC
RAF1	kinase		0.539	9.77E-05	CD44,CTSH,ITGAM,ITGB1,MMP1,PLEC,SERPINB2,TIMP1
SPI1	transcription regulator		1.964	1.04E-04	ACTB,CHI3L1,FCER1G,FTH1,ITGAM,ITGB2,MMP1
EPO	cytokine			1.04E-04	ACTB,ATP6V1B2,CLIC1,CTSZ,ITGB1,NPM1,RPLP0,TFRC,TPI1
resiquimod	chemical drug		0.816	1.08E-04	ATP5A1,ATP6V1B2,CD44,FH,LMNA,PKM,RAB7A
PURA	transcription regulator			1.10E-04	ACTA2,ITGAM,ITGAX
glutamine	chemical - endogenous mammalian			1.13E-04	ACTB,HK1,HSPA5,PHB,VIM
HGF	growth factor		-0.095	1.17E-04	ACTA2,CD44,HDGF,HK1,HK2,ITGB1,MMP1,PHB,SERPINB2,TAGLN2,TIMP1,VIM
Fcgr3	group			1.36E-04	ITGAM,ITGAX,ITGB2
LPXN	transcription regulator			1.40E-04	ACTA2,MYH11
ADAM9	peptidase			1.40E-04	ITGB1,TIMP1
potassium cyanide	chemical reagent			1.40E-04	MMP1,TIMP1
VHL	other		0.132	1.45E-04	CLTC,FTH1,FTL,LMNA,TFRC,VIM
PRNP	other		1.067	1.62E-04	CD44,CTSD,HSPA5,PDIA3
Laminin	complex			1.62E-04	ACTA2,ITGB1,MMP1,VIM
HBD	transporter			1.78E-04	CD44,FTH1,FTL,TFRC
methotrexate	chemical drug		0.000	1.89E-04	ACSL4,ACTB,ACTG1,ALDOA,GPI,GSN,HADHA,HSD17B4
TGFA	growth factor		1.291	1.90E-04	DDX5,GSTP1,ITGAM,PECAM1,VIM
hemin	chemical - endogenous mammalian		0.147	1.96E-04	FTH1,FTL,GSTP1,HSP90AB1
dimethyl sulfoxide	chemical drug		0.557	2.00E-04	ACTB,CALR,HSP90AB1,ITGAM,ITGB2,TFRC
HSP90B1	other			2.02E-04	CALR,HSPA5,ITGB2
EGF	growth factor	Activated	2.145	2.27E-04	ACSL4,CD44,CTSD,DDX5,GSTP1,ITGAM,ITGB1,MMP1,RALA,TIMP1,VIM
arsenic trioxide	chemical drug		0.468	2.28E-04	FTH1,HSPA5,ITGAM,ITGB1,TFRC,VDAC1
hydroxypropyl-beta-cyclodextrin	chemical reagent			2.41E-04	CTSB,CTSD,ITGAX
vancomycin	chemical drug		0.179	2.70E-04	CD44,GSTK1,RTN4,TIMP1,VIM
ARNT	transcription regulator			2.70E-04	CTSD,G6PD,GPI,TFRC,VIM
MECP2	transcription regulator			2.70E-04	ACTB,CAPG,GSTP1,HSPA5,LMNA
FEZF1	other			2.79E-04	MMP1,TIMP1
ATP2A1	transporter			2.79E-04	CALR,HSPA5
APAF1	other			2.79E-04	HSPA5,VIM
PODXL	kinase			2.79E-04	MMP1,VIM
PKN1	kinase			2.79E-04	ACTA2,MYH11
G6PC	phosphatase			2.79E-04	HSPA5,HYOU1
platelet activating factor	chemical - endogenous mammalian		1.227	2.80E-04	ITGAM,ITGB2,MMP1,TIMP1
RHOJ	enzyme			2.85E-04	ACTG1,GSN,MYH9
SP3	transcription regulator			3.27E-04	ACTA2,CHI3L1,HSPA5,MYH11,PKM,TIMP1,VIM
COMMD1	transporter			3.33E-04	ALDOA,HK2,TFRC
F2	peptidase		1.311	3.52E-04	ACTA2,CALR,CD44,CLIC1,ITGB1,MYH11,MYH9,TAGLN2
androgen	chemical - other		-0.849	3.73E-04	CALR,CD44,CTSB,CTSZ,GSN,ITGAM
bezafibrate	chemical drug		0.600	3.74E-04	ACSL4,ECI1,HADHA,HSD17B4,HSPA5
methapyrilene	chemical drug		1.000	3.88E-04	ACTG1,ALDOA,ATP6V1B2,CTSB,HSPA5,ITGB1
COL18A1	other		-1.387	3.94E-04	HK2,ITGB2,MMP1,PECAM1,VDAC1
actinomycin D	chemical drug		0.478	4.08E-04	ACTB,FTH1,GAPDH,GPI,GSTP1,HK1,NPM1
BAX	transporter	Activated	2.000	4.17E-04	CTSB,CTSD,CTSH,TIMP1
Y 27632	chemical drug		1.091	4.17E-04	ACTA2,ACTB,ACTG1,MYH11
NFkB (complex)	complex		0.631	4.24E-04	CD44,FTH1,HDGF,HLA-A,ITGAM,ITGB1,MMP1,PECAM1,SERPINB2,TFRC,TIMP1,VIM
IL5	cytokine		-0.358	4.45E-04	ALDOA,ALDOC,HSPA5,ITGAM,LMNB1,MTDH,TPI1,VIM
forskolin	chemical toxicant		1.342	4.59E-04	ACTA2,ACTB,ALDOA,ATP6V1B2,CALR,CD44,GSTP1,HK2,OPA1,RAB7A,SERPINB2,TIMP1
phosphatidylinositol	chemical - endogenous mammalian			4.64E-04	ACAT1,MMP1
FES	kinase			4.64E-04	ITGAM,ITGAX
NME3	kinase			4.64E-04	ITGB1,VIM
FOLR1	transporter			4.81E-04	ALDOC,ATP6V1B2,PFN1,TAGLN2,TPI1
Sos	group			5.04E-04	CD44,CHI3L1,EEA1,HSD17B10,ITGB1,MYH9,PFN1
PAK1	kinase			5.10E-04	CTSD,ITGAM,ITGB2
IL15	cytokine		0.714	5.61E-04	CD44,G6PD,GAPDH,ITGB1,PDIA3,PFN1,SLC25A5,TFRC,TIMP1
cobalt chloride	chemical reagent		0.975	5.97E-04	ALDOA,HSP90AB1,PKM,TFRC
CXCL12	cytokine		-0.391	6.04E-04	ACTA2,CD44,HNRNPD,ITGAX,ITGB1,VIM
medroxyprogesterone acetate	chemical drug		0.487	6.10E-04	CD44,ITGB1,ITGB2,LMNA,MMP1
MBD2	transcription regulator			6.38E-04	ACTB,G6PD,GSTP1,HK2
JUND	transcription regulator			6.38E-04	FTH1,MMP1,SERPINB2,TIMP1
NFKBIA	transcription regulator		-0.156	6.40E-04	AK2,CTSB,CTSZ,HK2,HSPA5,ITGB1,MMP1,SERPINB2,TFRC,TIMP1
MAPK14	kinase		0.485	6.47E-04	ACTA2,CALR,MMP1,MYH11,PECAM1,TIMP1
CDKN1A	kinase		0.140	6.52E-04	ACTA2,ACTB,CTSB,HSPA5,ITGAM,MMP1,NPM1
ICMT	enzyme			6.56E-04	ATP5B,LMNA,LMNB2
cycloheximide	chemical reagent	Inhibited	-2.439	6.91E-04	ACTB,ALDOA,CALR,CD44,ITGAM,MMP1,NPM1,SERPINB2,TIMP1
LOXL2	enzyme			6.92E-04	PECAM1,VIM
HIST1H1C	other			6.92E-04	ACTB,GAPDH
ATP2B2	transporter			6.92E-04	CALR,HSPA5
IGFBP4	other			6.92E-04	ACTA2,MYH11
hexarelin	chemical toxicant			6.92E-04	ATP5B,TIMP1
manganese	chemical - endogenous non-mammalian			6.92E-04	C5AR1,GAPDH
Immunoglobulin	complex		-1.195	7.09E-04	CALR,CTSZ,DYSF,FCER1G,ITGAX,RRBP1,TIMP1
CD38	enzyme		-0.808	7.17E-04	ALDOA,ALDOC,CD44,MTDH,TPI1,VIM
IGF1	growth factor	Activated	2.075	7.20E-04	ACTA2,CD44,CTSD,DDX5,GAPDH,HSPA5,MMP1,MYH11,VIM
IL8	cytokine		1.928	7.28E-04	CD44,ITGAM,ITGAX,ITGB2
chrysotile asbestos	chemical toxicant			7.37E-04	CTSZ,ITGAX,TIMP1
decitabine	chemical drug		0.564	7.54E-04	CD44,GSN,GSTP1,HK2,HNRNPD,MGST3,MMP1,RPL11,TFRC,VIM
trichostatin A	chemical drug		-0.765	7.61E-04	ACTB,CD44,G6PD,GSN,HNRNPD,ITGAM,MGST3,PHB,RPL13,TIMP1,VIM
SATB1	transcription regulator		-1.987	7.63E-04	ACTG1,CTSD,ILF3,ITGB1,RPLP0
camptothecin	chemical toxicant			7.86E-04	ACTA2,ALDOA,GPI,HLA-A,MMP1,PECAM1,PLEC,SERPINB2,SLC25A5,SSB,TAGLN2,TFRC
P38 MAPK	group		0.943	8.11E-04	CD44,HSPA5,ITGAM,ITGB2,MMP1,MYH11,RAB7A,SERPINB2
OSM	cytokine		0.182	8.11E-04	ASAH1,CTSH,ETFB,GNS,HK2,HLA-A,HSPA2,HSPA5,MMP1,OGDH,TIMP1
CEBPB	transcription regulator		-0.127	8.61E-04	ACTA2,CIRBP,DDX5,FTL,HSD17B4,HSPD1,MMP1,SQRDL,VIM
GDNF	growth factor			8.78E-04	ACTB,CTSB,GNB1,LMNB2
ETV4	transcription regulator			9.20E-04	ACTA2,PLEC,VIM
8-bromo-cAMP	chemical reagent		1.132	9.62E-04	ACSL4,CTSD,GSTP1,MMP1,SERPINB2,TIMP1
MED28	other			9.65E-04	ACTA2,MYH11
SEL1L	other			9.65E-04	HSPA5,TIMP1
ferric chloride	chemical toxicant			9.65E-04	FTH1,FTL
KITLG	growth factor			9.76E-04	ACTB,ATP6V1B2,CLIC1,FTH1,NPM1,RPLP0,SLC25A12
CD44	enzyme			9.83E-04	ACTB,CALR,CD44,HSP90AB1,VIM
CAMP	other	Activated	2.000	9.89E-04	C5AR1,ITGAM,ITGAX,ITGB2
MIF	cytokine		0.046	9.89E-04	ACTA2,CD44,MMP1,TIMP1
Nuclear factor 1	group			1.02E-03	ALDOA,CHI3L1,SLC25A5
VTN	other			1.02E-03	ITGAM,ITGB1,MMP1
2-cyano-3,12-dioxoolean-1,9-dien-28-oic acid	chemical drug			1.02E-03	ACTA2,FTH1,MMP1
SRF	transcription regulator		0.140	1.08E-03	ACTA2,ACTB,GSN,ITGB1,MYH11,MYH9,NPM1,SERPINB2
(+)-MK-801	chemical drug		-1.000	1.11E-03	ALDOA,HSPA5,ITGAM,TIMP1
raloxifene	chemical drug		0.000	1.12E-03	CTSH,GNS,IDH2,ITGB1,TFRC,TIMP1
PDX1	transcription regulator		-0.447	1.12E-03	ACTB,ACTG1,CD44,FH,HK1,SDHA
cigarette smoke	chemical toxicant			1.12E-03	ACTA2,FTL,G6PD,GSTP1,MMP1,TIMP1
indomethacin	chemical drug		1.915	1.16E-03	CD44,CTSD,ITGAM,MMP1,P4HB,TIMP1,VIM
CCL5	cytokine		1.000	1.17E-03	C5AR1,CD44,PLEC,SERPINB2
ELAVL1	other			1.24E-03	HNRNPD,HSPA2,KHSRP,RPL13
ITGAV	ion channel			1.24E-03	ITGB1,MMP1,TIMP1
PDGF BB	complex		0.089	1.28E-03	ACTA2,CD44,ITGB1,LMNA,MMP1,MYH11,RPL13,TIMP1
NEIL2	enzyme			1.28E-03	ACTB,GAPDH
methoxychlor	chemical toxicant			1.28E-03	G6PD,HSP90AB1
CYR61	other			1.37E-03	ITGB1,MMP1,TIMP1
ouabain	chemical drug			1.37E-03	ACTB,HSPA5,VIM
bromobenzene	chemical toxicant		-1.114	1.38E-03	GAPDH,GSTP1,HSPA5,TIMP1
simvastatin	chemical drug		0.979	1.42E-03	ACTA2,HK1,ITGB2,MMP1,TIMP1,VIM
IKBKB	kinase		0.404	1.45E-03	CD44,CTSB,CTSZ,HK2,LMNB1,MMP1,SERPINB2
GNA12	enzyme		-1.000	1.46E-03	G6PD,GSTP1,MYH11,VIM
PDGFRB	kinase			1.64E-03	ACTA2,MYH11
S100P	other			1.64E-03	ACTB,CTSD
ferric ammonium citrate	chemical drug			1.64E-03	FTH1,FTL
palmitic acid	chemical - endogenous mammalian		1.253	1.68E-03	ALDOA,GAPDH,HK2,HSPA5,IDH2
TNFSF10	cytokine		1.980	1.70E-03	FTH1,HLA-A,ITGAM,TIMP1
HDAC5	transcription regulator			1.77E-03	ACTA2,ATP5B,HK2
FOSL2	transcription regulator			1.77E-03	MMP1,SERPINB2,TIMP1
miR-124-3p (and other miRNAs w/seed AAGGCAC)	mature microRNA		-0.816	1.78E-03	AK2,GSN,ITGB1,LMNB1,MYH9,PGRMC2
HMOX1	enzyme		0.152	1.79E-03	ACTA2,ITGAM,PECAM1,SLC25A5
DYSF	other			1.79E-03	ACTG1,CTSH,FTL,TIMP1
IL10	cytokine		1.969	1.87E-03	ACTA2,CD44,CTSB,CTSZ,FCER1G,SERPINB2,TFRC,TIMP1
CP-55940	chemical reagent			1.93E-03	ACTB,ALDOC,GAPDH
brefeldin A	chemical - endogenous non-mammalian			1.93E-03	CD44,HLA-A,HSPA5
L-triiodothyronine	chemical - endogenous mammalian		1.195	1.98E-03	ACTB,CAPZA1,CD44,FH,G6PD,LMNA,MGST3,SSB
isobutylmethylxanthine	chemical toxicant		1.342	1.99E-03	ACSL4,CD44,ITGB2,RAB7A,TIMP1
S1PR2	G-protein coupled receptor			2.04E-03	ACTA2,TIMP1
HNRNPAB	enzyme			2.04E-03	ACTA2,VIM
CNTF	cytokine			2.06E-03	ACTB,MMP1,TIMP1,VIM
memantine	chemical drug			2.09E-03	GSTP1,HSP90AB1,HSPA5
mycophenolic acid	chemical drug			2.16E-03	ACTA2,HNRNPD,HSPA5,SERPINB2
rotenone	chemical toxicant			2.25E-03	ITGAM,MMP1,TIMP1
SYVN1	transporter		1.342	2.28E-03	CD44,HLA-A,ITGB1,PFN1,TFRC
zinc	chemical drug		0.927	2.37E-03	AIFM1,NPM1,SERPINB2,TFRC
AGT	growth factor		-0.018	2.37E-03	ACTA2,CALR,CD44,GSTP1,ITGB1,PFN1,SERPINB2,TFRC,TIMP1
MAPK10	kinase			2.48E-03	CD44,MMP1
EDNRA	transmembrane receptor			2.48E-03	ITGAM,TIMP1
FN1	enzyme		0.590	2.51E-03	ACTA2,CTSD,ITGAM,ITGB1,MMP1
ERK	group		0.000	2.57E-03	ITGAM,ITGB2,MMP1,PECAM1,SERPINB2,TIMP1
MKL2	transcription regulator			2.59E-03	ACTB,ITGB1,MYH9,SERPINB2
IL1R1	transmembrane receptor			2.61E-03	ACTA2,MYH11,TIMP1
LMNB1	other			2.61E-03	ATP5B,LMNA,LMNB2
AKT1	kinase		-0.728	2.63E-03	ACTA2,ITGB1,MATR3,MYH11,TIMP1,VIM
n-nitrosomethylbenzylamine	chemical toxicant			2.67E-03	CD44,DDX5,GSTK1,MGST3,USO1
RCE1	peptidase			2.80E-03	ATP5B,LMNA,LMNB2
TSC2	other			2.80E-03	GSN,HK2,HSPA5
Il8r	group			2.96E-03	ITGAM,ITGAX
STAT1/3/5 dimer	complex			2.96E-03	CHI3L1,MMP1
ZNF148	transcription regulator			2.96E-03	ITGAM,VIM
FCGR1A	transmembrane receptor			2.96E-03	ITGAM,ITGB2
antimycin A	chemical - endogenous non-mammalian			2.96E-03	MMP1,TIMP1
mannose	chemical - endogenous mammalian			2.96E-03	HSPA5,PDIA3
NPC1	transporter			3.01E-03	CTSB,CTSD,ITGAX
phenacetin	chemical drug			3.01E-03	CD44,TIMP1,VIM
etoposide	chemical drug		-0.277	3.02E-03	CTSD,FTH1,HK1,HK2,MMP1
IL13	cytokine	Activated	2.759	3.11E-03	CD44,CTSB,CTSH,G6PD,GSN,HK1,MMP1,TIMP1
thapsigargin	chemical toxicant		1.499	3.12E-03	C5AR1,CALR,HSPA5,ITGB2,VIM
Insulin	group		0.981	3.28E-03	ACTB,FTL,G6PD,GSTP1,HSPA5,MDH2,SLC25A5
FAS	transmembrane receptor			3.33E-03	ACTA2,CD44,MMP1,PECAM1,PLEC,SERPINB2,TAGLN2,TFRC
ciprofibrate	chemical drug		-0.322	3.41E-03	GSTP1,HADHA,HSD17B4,TAGLN2,TRPV2
Collagen(s)	complex			3.43E-03	ACTB,C5AR1,ITGAM
entinostat	chemical drug			3.43E-03	GSN,ITGAM,ITGAX
PPARG	ligand-dependent nuclear receptor		0.000	3.44E-03	ACTA2,CALR,GAPDH,HADHA,HK2,HYOU1,TKT,VIM
caffeic acid phenethyl ester	chemical toxicant		-0.927	3.47E-03	CD44,CTSB,FTH1,FTL
ladostigil	chemical drug			3.49E-03	ALDOC,TFRC
CFB	peptidase			3.49E-03	C5AR1,ITGAM
bisindolylmaleimide I	chemical - kinase inhibitor		-1.131	3.61E-03	CD44,HSP90AB1,HSPA5,MMP1
bleomycin	chemical drug		0.532	3.61E-03	ACTA2,CTSD,ITGB1,LMNB1,TIMP1
NRF1	transcription regulator			3.66E-03	FTH1,SDHA,VDAC1
FOXO1	transcription regulator			3.68E-03	ATP5B,GPI,HSPA5,MMP1,RAB7A,TKT
TO-901317	chemical reagent			3.68E-03	ECI1,G6PD,GPI,HK2,TIMP1,TKT
curcumin	chemical drug		1.219	3.76E-03	CLIC1,FTH1,FTL,GSTP1,MMP1,OGDH,TFRC
FOXA2	transcription regulator			3.82E-03	ACTA2,CHI3L1,HK2,MYH11,PKM
YWHAG	other			4.05E-03	GPI,HYOU1
GPER	G-protein coupled receptor			4.05E-03	ASAH1,HSPA5
mir-8	microRNA			4.05E-03	FTH1,ITGB1
LAMC1	other			4.05E-03	ACTA2,VIM
benzyl isothiocyanate	chemical - endogenous non-mammalian			4.05E-03	AIFM1,GSTP1
monorden	chemical - endogenous non-mammalian			4.05E-03	GSN,HSPA5
phenethyl isothiocyanate	chemical drug			4.05E-03	DDX5,GSTK1,MGST3,USO1
iron	chemical - endogenous mammalian			4.14E-03	FTH1,FTL,TFRC
estrogen receptor	group		-0.671	4.21E-03	CAPG,CD44,ITGB1,MMP1,TIMP1,VIM
IL1	group		0.342	4.36E-03	CTSB,FTH1,ITGAM,ITGB2,MMP1,SERPINB2,TIMP1
clofibrate	chemical drug		-1.977	4.37E-03	ECI1,GSTP1,HADHA,RTN4
MGEA5	enzyme		0.000	4.39E-03	ACTG1,AIFM1,ALDOC,G6PD,TIMP1,VIM
carboplatin	chemical drug			4.39E-03	CD44,TIMP1,VIM
PECAM1	other			4.65E-03	CD44,ITGAM
SPTLC2	enzyme			4.65E-03	HSPA5,TIMP1
PRKCI	kinase			4.65E-03	HK1,HK2
BDKRB2	G-protein coupled receptor			4.65E-03	CD44,ITGAM
HNRNPU	transporter			4.65E-03	ACTB,GAPDH
MST1R	kinase			4.65E-03	ACTA2,VIM
GATA6	transcription regulator			4.66E-03	ACTA2,MYH11,PECAM1
FSH	complex		1.067	4.69E-03	ACTA2,ACTB,CAPZA1,GNB1,HK2,PKM,TFRC,TIMP1
BCL2	transporter		1.948	4.87E-03	CTSH,ITGB1,TIMP1,VDAC1
fenofibrate	chemical drug		-0.152	4.89E-03	ACAT1,ACSL4,GAPDH,HADHA,HSD17B4,SUCLG1
inosine	chemical - endogenous mammalian			4.93E-03	FTL,TIMP1,VIM
Cg	complex		0.359	4.95E-03	ACTA2,ACTB,HK2,ITGB1,MMP1,PECAM1,TIMP1
LY294002	chemical - kinase inhibitor		-0.431	4.99E-03	ACAT1,ACTA2,GSTP1,HSP90AB1,HSPA5,ITGAM,LMNA,MYH11,VIM
C5	cytokine		1.698	5.05E-03	C5AR1,ITGAM,ITGB1,ITGB2
Ifn	group			5.05E-03	CD44,HLA-A,PECAM1,TFRC
RET	kinase			5.05E-03	CTSB,HSPD1,MMP1,RTN4
sulforafan	chemical drug			5.05E-03	FTL,GSTP1,TKT,VIM
MMP9	peptidase			5.21E-03	CTSB,ITGB1,TIMP1
3-nitropropionic acid	chemical toxicant			5.21E-03	ATP6V1B2,GPI,TPI1
farnesylthiosalicylic acid	chemical drug			5.21E-03	ALDOC,PKM,TPI1
ethidium	chemical toxicant			5.29E-03	MMP1,TIMP1
JUNB	transcription regulator			5.41E-03	FTH1,MMP1,SERPINB2,TIMP1
YY1	transcription regulator			5.77E-03	ACTA2,CAPG,HSPA5,LMNB1,MATR3,MYH11
FGF2	growth factor		-0.206	5.80E-03	ACTA2,FTH1,ITGB1,LMNA,MMP1,TIMP1,VIM
propylthiouracil	chemical drug			5.80E-03	G6PD,GSN,MGST3,MYH11
linoleic acid	chemical - endogenous mammalian			5.81E-03	HSPA5,MMP1,PECAM1
SCAP	other			5.81E-03	ACSL4,ALDOC,RDH11
SNCA	other			5.81E-03	CTSB,HSPA5,MMP1
Relaxin	group			5.97E-03	MMP1,TIMP1
BMPER	other			5.97E-03	ACTA2,PECAM1
NOV	growth factor			5.97E-03	ITGB1,MMP1
HEY1	transcription regulator			5.97E-03	ACTA2,MYH11
EHF	transcription regulator			5.97E-03	MMP1,TIMP1
CCL2	cytokine			6.12E-03	ACTA2,MMP1,TIMP1
hydrogen peroxide	chemical - endogenous mammalian		-0.728	6.16E-03	ACTA2,CTSB,CTSD,FTH1,MMP1,PDIA3,TFRC,VIM
Lh	complex			6.38E-03	ACTA2,ACTB,CAPZA1,GNB1,HK2,PHB
CAV1	other			6.40E-03	MMP1,NPM1,RALA,SLC25A12
SB203580	chemical - kinase inhibitor		-0.040	6.41E-03	ACTA2,GPI,GSTP1,ITGAM,MMP1,MYH11,TIMP1
MAP2K7	kinase			6.44E-03	HSPA5,ITGB1,PDIA3
LGALS3	other			6.44E-03	CTSH,ITGAM,LMNB1
FOSL1	transcription regulator			6.44E-03	CD44,MMP1,SERPINB2
ITGB3	transmembrane receptor			6.44E-03	MMP1,TIMP1,UBA52
paraquat	chemical toxicant		1.000	6.62E-03	GSTP1,ITGAM,MMP1,TIMP1
IL17R	complex			6.69E-03	MMP1,TIMP1
NFIX	transcription regulator			6.69E-03	CHI3L1,SLC25A5
ITGA2	other			6.69E-03	ITGB1,MMP1
CTSB	peptidase			6.69E-03	ACTA2,CTSB
POSTN	other			6.69E-03	ACTA2,VIM
miR-122-5p (miRNAs w/seed GGAGUGU)	mature microRNA			6.77E-03	ALDOA,P4HB,VIM
TBP	transcription regulator			6.77E-03	ACTB,GAPDH,HLA-A
BCR (complex)	complex		0.000	6.83E-03	CALR,CD44,HSPA5,ITGB1
CD28	transmembrane receptor		1.195	6.85E-03	CYC1,FCER1G,GAPDH,PHB,SLC25A5,SSB,TFRC
etalocib	chemical drug			6.88E-03	ITGAM
crizotinib	chemical drug			6.88E-03	VIM
CREB-NFkB	complex			6.88E-03	SERPINB2
Mef3	other			6.88E-03	ALDOA
CDC42BPB	kinase			6.88E-03	CTSB
Integrin alpha V beta 3	complex			6.88E-03	MMP1
SPRED2	cytokine			6.88E-03	VIM
MARCH2	enzyme			6.88E-03	TFRC
Lamin b	group			6.88E-03	LMNA
HOXA4	transcription regulator			6.88E-03	ITGB1
KRT3	other			6.88E-03	PECAM1
AP1M1	transporter			6.88E-03	HLA-A
SRRM1	other			6.88E-03	CD44
PAK4	kinase			6.88E-03	CTSB
MYLPF	other			6.88E-03	ACTA2
EHD1	other			6.88E-03	ITGB1
FAF1	other			6.88E-03	VIM
AFAP1	other			6.88E-03	ITGB1
TRD@	other			6.88E-03	FCER1G
KDELR1	transporter			6.88E-03	HSPA5
TSTA3	enzyme			6.88E-03	ACTA2
mir-138	microRNA			6.88E-03	VIM
KAT6A	enzyme			6.88E-03	GSTP1
GBP1	enzyme			6.88E-03	MMP1
PRB2	other			6.88E-03	SERPINB2
PSMA1	peptidase			6.88E-03	GSTP1
MYH10	other			6.88E-03	MYH9
THOC1	transcription regulator			6.88E-03	CALR
IFI30	enzyme			6.88E-03	HLA-A
ORC4	other			6.88E-03	LMNB2
TIAM2	enzyme			6.88E-03	VIM
DISC1	other			6.88E-03	ITGB1
COL10A1	other			6.88E-03	HSPA5
VPS18	transporter			6.88E-03	ITGB1
TNFAIP8	other			6.88E-03	MMP1
ITGA7	other			6.88E-03	ITGB1
RPN2	enzyme			6.88E-03	GSTP1
ORC3	other			6.88E-03	LMNB2
RXFP1	G-protein coupled receptor			6.88E-03	ACTA2
ATP6V1B1	transporter			6.88E-03	ATP6V1B2
SMARCD1	transcription regulator			6.88E-03	MMP1
polyhydroxyethyl methacrylate	chemical reagent			6.88E-03	CALR
roquinimex	chemical reagent			6.88E-03	SERPINB2
D-lactic acid	chemical - endogenous mammalian			6.88E-03	ITGAM
(S)-duloxetine	chemical drug			6.88E-03	ACTB
ropivacaine	chemical drug			6.88E-03	ITGAM
4-cresol	chemical toxicant			6.88E-03	ITGAM
cycloleucine	chemical toxicant			6.88E-03	PHB
ferric citrate	chemical drug			6.88E-03	FTH1
ETS	group			7.44E-03	CHI3L1,TIMP1
peoniflorin	chemical - endogenous non-mammalian			7.44E-03	ATP5A1,PDIA3
HFE	transmembrane receptor			7.44E-03	HSPA5,TFRC
MMP2	peptidase			7.44E-03	CD44,MMP1
leuprolide	biologic drug			7.44E-03	MMP1,TIMP1
MYOD1	transcription regulator		0.391	7.45E-03	ACTA2,ALDOA,DYSF,LMNB2,TKT
MAPK3	kinase			7.46E-03	ITGB1,MMP1,TIMP1
RHO	G-protein coupled receptor			7.46E-03	CD44,GNB1,HK2
Alpha catenin	group		-1.000	7.51E-03	CTSB,ITGAM,TIMP1,VIM
Ras	group			7.51E-03	GSTP1,MMP1,MYH11,NPM1
SMAD3	transcription regulator		0.731	7.81E-03	ACTA2,ITGB1,MMP1,TIMP1,VIM
KLF4	transcription regulator			8.19E-03	ACTA2,ITGAM,SERPINB2
phenylbutazone	chemical drug			8.19E-03	CD44,TIMP1,VIM
Collagen type IV	complex			8.23E-03	ACTA2,ITGB1
TWIST2	transcription regulator			8.23E-03	CD44,VIM
S100A8	other			8.23E-03	ITGAM,MMP1
BACH1	transcription regulator			8.23E-03	FTH1,MMP1
ferulic acid	chemical - endogenous non-mammalian			8.23E-03	MMP1,TIMP1
GnRH analog	biologic drug		1.134	8.30E-03	ATP5A1,CALR,CYC1,HSP90AB1,HSPA2,RALA,VAT1
EP300	transcription regulator		-0.132	8.55E-03	FTH1,HSP90AB1,ITGB2,LMNA,MMP1
4-phenylbutyric acid	chemical - endogenous mammalian			8.57E-03	CALR,HLA-A,HSPA5
homocysteine	chemical - endogenous non-mammalian			8.57E-03	HSPA5,ITGAM,TIMP1
HNF1A	transcription regulator		1.131	8.88E-03	AK2,CTSZ,FH,HSPA5,OGDH,TFRC,TMEM33,TPI1
N-acetyl-L-cysteine	chemical drug		-0.482	8.94E-03	ACTA2,GSTP1,HSPA5,ITGAM,MYH11
tributyrin	chemical drug			8.96E-03	HNRNPD,HSPA5,SERPINB2
1-alpha, 25-dihydroxy vitamin D3	chemical drug		0.415	9.00E-03	G6PD,GAPDH,HSD17B4,HSPD1,ITGAM,ITGAX,MMP1,TAGLN2
S100A9	other			9.06E-03	ITGAM,MMP1
BSG	transporter			9.06E-03	MMP1,VIM
PDGFC	growth factor			9.06E-03	ACTA2,TIMP1
AZGP1	transporter			9.06E-03	HK2,VIM
sorafenib	chemical drug			9.06E-03	HSPA5,VIM
isoproterenol	chemical drug	Activated	2.000	9.25E-03	ACSL4,ACTA2,RAB7A,TIMP1
ERBB2	kinase		-0.896	9.29E-03	ACSL4,ACTA2,ACTB,ALDOC,CTSB,ETFB,ITGB1,MMP1,SQRDL,VIM
gentamicin C	chemical drug			9.36E-03	CD44,TIMP1,VIM
calphostin C	chemical - kinase inhibitor			9.36E-03	ACTA2,HSPA5,P4HB
lomustine	chemical drug			9.36E-03	CD44,TIMP1,VIM
E2F1	transcription regulator		0.000	9.39E-03	CALR,CLIC1,CTSB,HADHA,MMP1,PHB,VIM
Vegf	group		0.816	9.53E-03	CD44,CHI3L1,HK2,ITGB1,SERPINB2,TIMP1,VIM
LIF	cytokine		0.943	9.54E-03	ACTA2,HK2,MMP1,PECAM1,TIMP1
streptozocin	chemical drug		0.193	9.54E-03	HSPD1,LMNB1,SLC25A5,VDAC1,VIM
PRKCE	kinase			9.77E-03	ACTA2,HSP90AB1,HSPA5
tunicamycin	chemical - endogenous non-mammalian		1.193	9.80E-03	CALR,HSPA5,MTDH,VIM
ADORA2A	G-protein coupled receptor		0.000	9.80E-03	ALDOC,ATP6V1B2,GPI,P4HB
TERT	enzyme			9.80E-03	GSN,MMP1,SERPINB2,VIM
SEMA7A	other			9.92E-03	CTSB,TIMP1
NFIC	transcription regulator			9.92E-03	ALDOA,SLC25A5
nicotinic acid	chemical - endogenous mammalian			9.92E-03	G6PD,GAPDH
amino acids	chemical - endogenous mammalian			9.92E-03	ACTB,GAPDH
prostaglandin E2	chemical - endogenous mammalian		1.451	9.96E-03	ACTA2,CD44,EEA1,ITGB1,LMNA,MMP1
NFYB	transcription regulator			1.01E-02	ACTA2,ACTB,ATP5B,FTH1,GAPDH,VIM
IL18	cytokine		0.621	1.04E-02	CD44,ITGAM,MMP1,TIMP1
PPP3CA	phosphatase			1.06E-02	FTL,GSTP1,VIM
triamterene	chemical drug			1.06E-02	CD44,TIMP1,VIM
lipoxin A4	chemical - endogenous mammalian			1.08E-02	SERPINB2,TIMP1
PTPN6	phosphatase			1.08E-02	ITGB2,TIMP1
ochratoxin A	chemical toxicant			1.08E-02	GSTP1,TIMP1
XBP1	transcription regulator		1.378	1.08E-02	CALR,HSPA5,HYOU1,PDIA3,USO1
U0126	chemical - kinase inhibitor		-0.412	1.09E-02	CD44,GSN,HSP90AB1,HSPA5,MMP1,PECAM1,SERPINB2,VIM
IKBKG	kinase		1.192	1.12E-02	CTSB,CTSZ,HK2,SERPINB2
gemfibrozil	chemical drug			1.15E-02	ECI1,HADHA,RTN4
cadmium	chemical toxicant			1.15E-02	GNS,HSPA5,TIMP1
tetrachlorodibenzodioxin	chemical toxicant		-1.555	1.15E-02	CTSD,HSPA2,ITGAX,MMP1,RPL29,SERPINB2,SLC25A5
TCR	complex		1.982	1.16E-02	CTSB,HSPA5,HSPD1,LMNB1,P4HB,SCARB2
HEY2	transcription regulator			1.17E-02	ACTA2,MYH11
DRAP1	transcription regulator			1.17E-02	GAPDH,RPLP0
HRG	other			1.17E-02	ITGAX,TIMP1
mifepristone	chemical drug		-1.706	1.18E-02	CHI3L1,CTSD,FTH1,HSPA5,ITGAM,MMP1
TNFSF12	cytokine			1.20E-02	ITGAM,MMP1,TIMP1
MAP2K6	kinase			1.20E-02	ACTA2,MMP1,MYH11
ANXA7	ion channel			1.20E-02	CTSB,GSTP1,ITGAM
lysophosphatidic acid	chemical - other			1.25E-02	ACTA2,ITGAM,RALA
SREBF2	transcription regulator			1.25E-02	ALDOC,G6PD,RDH11
halofuginone	chemical drug			1.25E-02	CD44,HK1,PKM,TIMP1
CEBPA	transcription regulator		0.152	1.26E-02	CHI3L1,GAPDH,GSTP1,HSPA5,ITGAM,ITGAX,SERPINB2
Ubiquitin	group			1.27E-02	HSPA5,HSPD1
HDL	complex			1.27E-02	ITGB1,ITGB2
CCL3	cytokine			1.27E-02	ITGAM,ITGB1
CTF1	cytokine			1.27E-02	MMP1,TIMP1
SFRP1	transmembrane receptor			1.27E-02	ACTA2,MMP1
CCR1	G-protein coupled receptor			1.27E-02	ITGAM,VIM
oltipraz	chemical drug			1.27E-02	FTH1,GSTP1
tamoxifen	chemical drug		0.260	1.27E-02	ASAH1,CTSD,GAPDH,HSP90AB1,MMP1
KLF2	transcription regulator			1.28E-02	PECAM1,RALA,TFRC,TIMP1
GH1	growth factor			1.33E-02	ACTB,FTH1,GSTP1,TKT,VIM
rosiglitazone	chemical drug		-0.647	1.35E-02	ASAH1,ETFA,HSPA5,ITGAM,MDH2,PECAM1,TIMP1
SOD1	enzyme			1.35E-02	ACTB,FTH1,GSTP1,TFRC
ABCB4	transporter			1.37E-02	ACTA2,TIMP1
PRKCQ	kinase			1.37E-02	CD44,MMP1
Rp-8-Br-cGMPS	chemical - kinase inhibitor			1.37E-02	ITGAM
gentamicin C1	chemical drug			1.37E-02	CD44
globotriaosylceramide	chemical - endogenous mammalian			1.37E-02	CD44
2,2,2-trichloroethanol	chemical toxicant			1.37E-02	TIMP1
Gα12/13	group			1.37E-02	MMP1
Pdgfra-Pdgfrb	complex			1.37E-02	TIMP1
RAB7B	enzyme			1.37E-02	CTSD
CHD5	enzyme			1.37E-02	VIM
VIMP	other			1.37E-02	HSPA5
TPH2	enzyme			1.37E-02	ITGAM
GIMAP1-GIMAP5	other			1.37E-02	HSPD1
MAF1	other			1.37E-02	ACTB
PACS2	other			1.37E-02	HSPA5
CTS-1027	chemical drug			1.37E-02	ACTA2
RBBP5	other			1.37E-02	CTSD
ACTC1	enzyme			1.37E-02	ACTA2
ZNF224	other			1.37E-02	ALDOA
RAB27A	enzyme			1.37E-02	CD44
PURB	transcription regulator			1.37E-02	ACTA2
ARID5B	transcription regulator			1.37E-02	ACTA2
LAMA3	other			1.37E-02	MMP1
TLN1	other			1.37E-02	ITGB1
miR-183-5p (miRNAs w/seed AUGGCAC)	mature microRNA			1.37E-02	IDH2
RALBP1	enzyme			1.37E-02	GAPDH
MCM4	enzyme			1.37E-02	LMNB2
VRK1	kinase			1.37E-02	MMP1
GNG7	enzyme			1.37E-02	GNB1
MCM3	enzyme			1.37E-02	LMNB2
ORC6	other			1.37E-02	LMNB2
ORC1	other			1.37E-02	LMNB2
HTR3A	ion channel			1.37E-02	ITGAM
DUSP2	phosphatase			1.37E-02	MMP1
GFAP	other			1.37E-02	VIM
BNIP3	other			1.37E-02	AIFM1
CDC6	other			1.37E-02	LMNB2
econazole	chemical drug			1.37E-02	HSPA5
safrole	chemical toxicant			1.37E-02	AIFM1
thiamine	chemical - endogenous mammalian			1.37E-02	TKT
glutathione ethyl ester	chemical drug			1.37E-02	MMP1
(6S)-hydroxyhyoscyamine	chemical - endogenous non-mammalian			1.37E-02	HSPA5
steroid hormone	chemical - other			1.37E-02	AIFM1
bucladesine	chemical toxicant		-0.128	1.39E-02	C5AR1,CD44,GSTP1,ITGB2,MMP1,TIMP1
tetracycline	chemical drug			1.40E-02	HADHA,HSPD1,VDAC1
berberine	chemical drug			1.40E-02	ATP5A1,MMP1,TIMP1
grape seed extract	biologic drug			1.47E-02	HSPD1,VIM
POLR2A	enzyme			1.47E-02	ACTB,GAPDH
ANXA1	other			1.47E-02	ITGAM,ITGB2
IL1A	cytokine		1.091	1.49E-02	CD44,FTH1,ITGB1,MMP1,TIMP1
Retnlb	other			1.50E-02	ACTA2,LMNB1,TIMP1
NFYA	transcription regulator			1.50E-02	FTH1,HSPA5,PKM
MAPK11	kinase			1.58E-02	CALR,TIMP1
NOTCH3	transcription regulator			1.58E-02	ACTA2,MYH11
TCF7L2	transcription regulator			1.58E-02	FH,MMP1
TYROBP	transmembrane receptor			1.58E-02	ITGAX,ITGB1
thalidomide	chemical drug			1.58E-02	ITGAM,PECAM1
N-formyl-Met-Leu-Phe	chemical reagent			1.58E-02	ITGAM,ITGB2
MYB	transcription regulator			1.61E-02	HSPA5,MMP1,VIM
Tgf beta	group		0.532	1.66E-02	ACTA2,ITGB1,MMP1,TIMP1,VIM
imatinib	chemical drug			1.67E-02	ITGAM,ITGAX,MMP1
deferoxamine	chemical drug		0.192	1.68E-02	ALDOA,MMP1,PKM,TFRC
ACOX1	enzyme		0.000	1.68E-02	GSTP1,HSPA5,TAGLN2,TRPV2
GCK	kinase			1.69E-02	ATP5A1,FH
PIK3CA	kinase			1.69E-02	HSP90AB1,ITGAM
DDIT3	transcription regulator			1.69E-02	HSPD1,ITGAM
PTTG1	transcription regulator			1.69E-02	CD44,VIM
ELANE	peptidase			1.69E-02	CTSB,HSPA5
FASLG	cytokine			1.69E-02	CD44,FTH1
dichlorovinylcysteine	chemical toxicant			1.69E-02	ACAT1,MDH2
PPARGC1A	transcription regulator		-1.936	1.76E-02	ACAT1,ATP5B,MDH2,SDHA
allopurinol	chemical drug			1.78E-02	CD44,TIMP1,VIM
SPP1	cytokine			1.78E-02	CD44,MMP1,TIMP1
potassium chloride	chemical drug			1.78E-02	CALR,HSPA5,PDIA3
TGM2	enzyme		1.400	1.78E-02	C5AR1,FCER1G,ITGAM,ITGAX,SERPINB2
EGR1	transcription regulator		1.103	1.80E-02	CD44,FTL,ITGAM,TIMP1
IFRD1	other			1.80E-02	CTSZ,HK1
PIAS1	transcription regulator			1.80E-02	ACTA2,MYH11
HBEGF	growth factor			1.80E-02	HK2,ITGB1
fasudil	chemical drug			1.80E-02	ACTA2,MYH11
FOXA1	transcription regulator			1.84E-02	ACTA2,HK1,MYH11
3,4,5,3',4'-pentachlorobiphenyl	chemical toxicant			1.84E-02	CD44,GSTP1,HSPA2
eicosapentenoic acid	chemical drug			1.84E-02	ACAT1,CD44,MMP1
trinitrobenzenesulfonic acid	chemical reagent			1.90E-02	CD44,ITGAM,TIMP1
arachidonic acid	chemical - endogenous mammalian			1.90E-02	G6PD,PECAM1,VIM
GAPDH	enzyme			1.92E-02	FCER1G,GAPDH
PLP1	other			1.92E-02	HSPA5,TIMP1
ALDH1A2	enzyme			1.92E-02	CD44,TIMP1
C5AR1	G-protein coupled receptor			1.92E-02	C5AR1,FCER1G
amiodarone	chemical drug			1.92E-02	ASAH1,HSPD1
fluvoxamine	chemical drug			1.92E-02	ACTB,GAPDH
ribavirin	chemical drug			1.92E-02	ITGAM,ITGB2
MITF	transcription regulator	Activated	2.000	1.97E-02	ASAH1,ATP6V1B2,CD44,VAT1
RUNX1	transcription regulator			2.02E-02	CHI3L1,MYH9,TIMP1
AKT2	kinase			2.04E-02	ITGB1,VIM
testosterone	chemical - endogenous mammalian		-0.928	2.04E-02	ALDOA,ATP5F1,HSP90AB1,HSPD1,ITGB1,RALA
sangivamycin	chemical - endogenous non-mammalian			2.05E-02	MMP1
benfotiamine	chemical drug			2.05E-02	TKT
Hbb	other			2.05E-02	PECAM1
Esr1-Estrogen-Sp1	complex			2.05E-02	CTSD
LETM1	other			2.05E-02	AIFM1
RECQL4	enzyme			2.05E-02	LMNB2
Eif2	complex			2.05E-02	HSPA5
Ap1 gamma	group			2.05E-02	HLA-A
methylamphotericin B	chemical drug			2.05E-02	TIMP1
Eotaxin	group			2.05E-02	ITGAM
Hspg	group			2.05E-02	MMP1
GTF2F2	transcription regulator			2.05E-02	CYC1
ABL2	kinase			2.05E-02	MMP1
WISP1	other			2.05E-02	MMP1
MARCH8	enzyme			2.05E-02	CD44
MRE11A	enzyme			2.05E-02	LMNB2
CXCL5	cytokine			2.05E-02	ITGAM
TAOK2	kinase			2.05E-02	GSTP1
HAO1	enzyme			2.05E-02	HSPA5
riociguat	chemical drug			2.05E-02	TIMP1
HPX	transporter			2.05E-02	ITGAM
PTGES3	enzyme			2.05E-02	CTSD
RALGDS	other			2.05E-02	RALA
UTRN	transmembrane receptor			2.05E-02	ACTG1
PPP1R1A	phosphatase			2.05E-02	HSPA5
KHDRBS1	transcription regulator			2.05E-02	CD44
CCL25	cytokine			2.05E-02	MMP1
SLC12A6	transporter			2.05E-02	VIM
SLC37A4	transporter			2.05E-02	HSPA5
RECQL	enzyme			2.05E-02	LMNB2
PSMB5	peptidase			2.05E-02	GSTP1
HES6	transcription regulator			2.05E-02	MMP1
GPX4	enzyme			2.05E-02	MMP1
SIX4	transcription regulator			2.05E-02	ALDOA
CTH	enzyme			2.05E-02	HSPA5
phenylacetic acid	chemical - endogenous mammalian			2.05E-02	HLA-A
2,2'-dipyridyl	chemical toxicant			2.05E-02	FTH1
chlordecone	chemical toxicant			2.05E-02	HSPA5
natamycin	chemical drug			2.05E-02	TIMP1
(Ala9)-autocamtide-2	chemical - kinase inhibitor			2.05E-02	MMP1
trehalose	chemical - endogenous mammalian			2.05E-02	VIM
BMP6	growth factor			2.09E-02	ACTA2,CD44,TIMP1
oleic acid	chemical - endogenous mammalian			2.09E-02	GAPDH,HK2,HSPA5
fulvestrant	chemical drug		1.000	2.12E-02	G6PD,GSTP1,ITGB1,SLC25A5,TFRC
XDH	enzyme			2.16E-02	ACTA2,VIM
PI3K (family)	group			2.16E-02	HSPA5,ITGB1
KLF1	transcription regulator			2.16E-02	CD44,PECAM1
GTF2B	transcription regulator			2.16E-02	ACTB,GAPDH
NR3C1	ligand-dependent nuclear receptor			2.22E-02	ACAT1,ACTB,DDX5,FCER1G,GSTP1,HSP90AB1,ITGB2,MMP1,RTN4
ERK1/2	group		0.895	2.22E-02	ASAH1,CD44,CTSB,HSPA5,MMP1
nicotine	chemical drug			2.23E-02	ALDOA,CD44,ITGAM,MATR3
ADCYAP1	other		1.929	2.26E-02	ACAT1,HK1,IDH2,ITGAM,SCAMP3
F2RL1	G-protein coupled receptor			2.28E-02	CTSD,SERPINB2
OLR1	transmembrane receptor			2.28E-02	ITGAM,MMP1
ibuprofen	chemical drug			2.28E-02	ITGAM,MMP1
PSEN2	peptidase			2.29E-02	ACTB,CTSZ,GNB1
RAC1	enzyme			2.29E-02	ACTA2,ITGB1,MMP1
hyaluronic acid	chemical - endogenous mammalian			2.35E-02	CD44,MMP1,TIMP1
NOTCH1	transcription regulator			2.38E-02	ACTA2,ITGAM,ITGB1,MMP1
APLN	other			2.41E-02	PECAM1,TAGLN2
MSTN	growth factor			2.41E-02	ACTA2,VIM
WISP2	growth factor			2.41E-02	CD44,VIM
BRAF	enzyme			2.41E-02	ITGB1,MMP1
SMARCB1	transcription regulator			2.43E-02	ACAT1,CD44,GSN,MMP1
CSF1	cytokine		1.954	2.48E-02	FCER1G,HSPA5,ITGAM,ITGB1
Pdgf (complex)	complex			2.49E-02	CD44,MMP1,TIMP1
Jnk	group			2.53E-02	ACTA2,CD44,HSPA5,MMP1
STAT	group			2.54E-02	MMP1,TIMP1
Ige	complex			2.54E-02	FCER1G,VIM
RUNX3	transcription regulator			2.54E-02	ITGAM,ITGAX
EGTA	chemical reagent			2.54E-02	HSPA5,ITGAM
SLC13A1	transporter			2.57E-02	ACTG1,HK2,HSPA5
reactive oxygen species	chemical toxicant			2.57E-02	ACTA2,MMP1,PHB
AGN194204	chemical drug		1.067	2.63E-02	HK2,ITGB2,LMNA,TIMP1
RUNX2	transcription regulator			2.64E-02	ACTA2,MYH11,TIMP1
mir-1	microRNA			2.67E-02	HSPD1,TAGLN2
Pkc(s)	group			2.68E-02	HSPA5,ITGB1,MMP1,P4HB
platelet activating factor-C16	chemical - endogenous mammalian			2.72E-02	ITGAM
PALLD	other			2.72E-02	ITGB1
repertaxin	chemical drug			2.72E-02	ITGAM
tyrosine kinase	group			2.72E-02	CD44
Erm	group			2.72E-02	CD44
dietary fat derivative	chemical drug			2.72E-02	ITGAM
ATF6B	transcription regulator			2.72E-02	HSPA5
USE1	other			2.72E-02	HSPA5
CA4	enzyme			2.72E-02	HSPA5
RPRD1A	other			2.72E-02	CTSB
NXF1	transporter			2.72E-02	CD44
Nc2	complex			2.72E-02	HLA-A
LGI1	other			2.72E-02	MMP1
PDGFD	growth factor			2.72E-02	MMP1
ZFYVE9	peptidase			2.72E-02	ACTA2
TAP1	transporter			2.72E-02	HLA-A
TNFRSF10A	transmembrane receptor			2.72E-02	ITGAM
DST	other			2.72E-02	HSPA5
RGL2	other			2.72E-02	RALA
MCF2	other			2.72E-02	ITGB1
HPGDS	enzyme			2.72E-02	ITGAM
crocin	chemical drug			2.72E-02	HSPA5
GAL3ST1	enzyme			2.72E-02	ITGB1
CUL3	enzyme			2.72E-02	MMP1
TIAM1	other			2.72E-02	TIMP1
NRP1	transmembrane receptor			2.72E-02	ACTA2
LSM1	other			2.72E-02	NPM1
VCP	enzyme			2.72E-02	HSPA5
CXCL13	cytokine			2.72E-02	MMP1
BATF3	transcription regulator			2.72E-02	MMP1
ELN	other			2.72E-02	MMP1
IPO9	transporter			2.72E-02	ITGB1
SCIN	other			2.72E-02	GSN
EGTA acetoxymethyl ester	chemical reagent			2.72E-02	SERPINB2
coenzyme Q10	chemical drug			2.72E-02	ATP5B
e7820	chemical drug			2.72E-02	ITGB1
PTIO	chemical reagent			2.72E-02	ITGAM
retinaldehyde	chemical - endogenous mammalian			2.72E-02	CD44
tiotropium	chemical drug			2.72E-02	MMP1
lactose	chemical - endogenous mammalian			2.72E-02	MMP1
desmosterol	chemical - endogenous mammalian			2.72E-02	ACSL4
EGFR	kinase		0.147	2.77E-02	ACTA2,ACTB,CHI3L1,MMP1,VIM
corticosteroid	chemical drug			2.81E-02	MMP1,SERPINB2
rasagiline	chemical drug			2.81E-02	ALDOC,TFRC
SKIL	transcription regulator			2.81E-02	ACTA2,VAT1
NRL	transcription regulator			2.81E-02	GNB1,RTN4
S-nitrosoglutathione	chemical toxicant			2.81E-02	DDX5,ITGAM
Ro31-8220	chemical - kinase inhibitor			2.81E-02	ITGB1,MMP1
doxorubicin	chemical drug		1.765	2.81E-02	CD44,CTSB,CTSD,FTH1,TIMP1,VIM
RORA	ligand-dependent nuclear receptor			2.89E-02	ACSL4,ACTB,GSTP1,MGST3
CYP1A1	enzyme			2.94E-02	ETHE1,LMNA,LMNB2
DNMT1	enzyme			2.95E-02	GSTP1,SERPINB2
miR-145-5p (and other miRNAs w/seed UCCAGUU)	mature microRNA			2.95E-02	ACTA2,MMP1
BMI1	other			2.95E-02	HK2,VIM
SNAI2	transcription regulator			2.95E-02	ITGB1,VIM
DKK1	growth factor			2.95E-02	ACTA2,CD44
cytochalasin D	chemical toxicant			2.95E-02	ACTA2,RPLP0
vincristine	chemical drug			2.95E-02	HSP90AB1,LMNB1
ethionine	chemical toxicant			2.95E-02	CD44,TIMP1
D-galactosamine	chemical - endogenous mammalian			2.95E-02	CTSB,TIMP1
SMAD4	transcription regulator			3.00E-02	ITGB1,MMP1,PGRMC2,TIMP1
H-7	chemical - kinase inhibitor			3.09E-02	ITGB1,MMP1
ursolic acid	chemical - endogenous non-mammalian			3.09E-02	MMP1,PECAM1
NR1H4	ligand-dependent nuclear receptor			3.18E-02	ACTA2,ITGAM,TIMP1
AVP	other			3.23E-02	ACTA2,HSPA5
INHA	growth factor			3.26E-02	ACTA2,LMNA,MYH11
TGFBR2	kinase			3.35E-02	ACTA2,C5AR1,CD44,TIMP1
MYOCD	transcription regulator			3.38E-02	ACTA2,MYH11
lactosylceramide	chemical - endogenous mammalian			3.39E-02	PECAM1
chondroitin sulfate E	chemical - endogenous mammalian			3.39E-02	CALR
SYK/ZAP	group			3.39E-02	MMP1
edratide	chemical drug			3.39E-02	CD44
sulfadimethoxine	chemical toxicant			3.39E-02	GSTP1
CYB5R4	enzyme			3.39E-02	HSPA5
Laminin2	complex			3.39E-02	ACTA2
ERN2	kinase			3.39E-02	HSPA5
KRT19	other			3.39E-02	HSPA5
DUSP4	phosphatase			3.39E-02	MMP1
MRAS	enzyme			3.39E-02	VIM
RHOH	enzyme			3.39E-02	ITGB2
MAD2L2	enzyme			3.39E-02	VIM
CDH4	other			3.39E-02	MMP1
TADA3	transcription regulator			3.39E-02	CTSD
CXCR3	G-protein coupled receptor			3.39E-02	MMP1
BCAR3	other			3.39E-02	RALA
HEPH	transporter			3.39E-02	RTN4
ORC2	other			3.39E-02	LMNB2
MYCL1	transcription regulator			3.39E-02	HSPD1
GPR37	G-protein coupled receptor			3.39E-02	HSPA5
RFXANK	transcription regulator			3.39E-02	HLA-A
CLDN2	other			3.39E-02	ITGB1
acetazolamide	chemical drug			3.39E-02	HSPA5
3-aminotriazole	chemical toxicant			3.39E-02	MMP1
mibefradil	chemical drug			3.39E-02	ITGB2
Collagen type V	complex			3.39E-02	ITGB1
prodigiosin	chemical toxicant			3.39E-02	HSPA5
tin mesoporphyrin	chemical drug			3.39E-02	SLC25A5
phloroglucinol	chemical drug			3.39E-02	MMP1
3-beta,17-beta-androstanediol	chemical - endogenous mammalian			3.39E-02	GSTP1
cephaloridine	chemical drug			3.42E-02	G6PD,GSTP1,TFRC
5-azacytidine	chemical drug			3.51E-02	CD44,GSTP1,HK2
MOG	other			3.53E-02	C5AR1,CD44
CAT	enzyme			3.53E-02	MMP1,TIMP1
NME1	kinase			3.53E-02	CTSD,TIMP1
dimethylnitrosamine	chemical toxicant			3.53E-02	ACTA2,TIMP1
3,3'-diindolylmethane	chemical drug			3.53E-02	HLA-A,VIM
glucosamine	chemical - endogenous mammalian			3.53E-02	MDH2,SLC25A5
HOXA10	transcription regulator		0.000	3.59E-02	ACTB,FCER1G,IDH2,P4HB
IL11	cytokine			3.68E-02	MMP1,TIMP1
RAC2	enzyme			3.68E-02	ALDOA,TKT
TFAP2C	transcription regulator			3.68E-02	AIFM1,HK1
2-amino-1-methyl-6-phenylimidazo(4,5-b)pyridine	chemical drug			3.68E-02	HSPA5,HSPD1
minocycline	chemical drug			3.68E-02	ITGAM,ITGAX
2-deoxyglucose	chemical drug			3.68E-02	HSPA5,PDIA3
SP600125	chemical - kinase inhibitor		0.218	3.72E-02	CD44,GNS,MMP1,PLEC
POR	enzyme			3.72E-02	ACTG1,ECI1,ETHE1,HSD17B10
TNFRSF1A	transmembrane receptor			3.77E-02	CD44,ITGAM,MMP1
miR-1 (and other miRNAs w/seed GGAAUGU)	mature microRNA		-1.192	3.78E-02	DDX5,G6PD,HSPD1,TAGLN2
PDGFB	growth factor			3.84E-02	ACTA2,TIMP1
diphenyleneiodonium	chemical reagent			3.84E-02	ACTA2,TIMP1
AICAR	chemical - endogenous mammalian			3.84E-02	ACTA2,HK2
SRC	kinase			3.86E-02	CTSB,MMP1,VIM
CSF2	cytokine		0.651	3.90E-02	C5AR1,ILF3,ITGAM,ITGAX,MMP1
Hmga1	transcription regulator			3.95E-02	ACTA2,CTSH,GSN
PTK2	kinase			3.99E-02	ACTA2,TIMP1
FGF10	growth factor			3.99E-02	CTSB,CTSH
CDH1	other			3.99E-02	MMP1,VIM
testosterone propionate	chemical drug			3.99E-02	CALR,CLTC
let-7a-5p (and other miRNAs w/seed GAGGUAG)	mature microRNA			4.04E-02	ACTA2,CAPG,VIM
Cbp/p300-Maf-Nfe2l2	complex			4.06E-02	FTL
SCGB3A2	other			4.06E-02	CTSD
MYOC	other			4.06E-02	HSPA5
WAC	other			4.06E-02	G6PD
AQP11	transporter			4.06E-02	TIMP1
PPP1R14B	phosphatase			4.06E-02	PECAM1
EN2	transcription regulator			4.06E-02	ALDOC
sphingomyelinase	group			4.06E-02	MMP1
RO4929097	chemical drug			4.06E-02	PECAM1
WDR5	enzyme			4.06E-02	VIM
ERVW-1	other			4.06E-02	HSPA5
MGP	other			4.06E-02	ACTA2
H6PD	enzyme			4.06E-02	HSPA5
SPOP	other			4.06E-02	MMP1
CNGA3	ion channel			4.06E-02	HSPA5
CNGB3	ion channel			4.06E-02	HSPA5
MALT1	peptidase			4.06E-02	CD44
CD82	other			4.06E-02	TIMP1
CCL1	cytokine			4.06E-02	ITGB2
mir-320	microRNA			4.06E-02	TFRC
mir-150	microRNA			4.06E-02	ACTA2
MT3	other			4.06E-02	GSTP1
NCK1	kinase			4.06E-02	HSPA5
KRT14	other			4.06E-02	HSPA5
Pde4d	enzyme			4.06E-02	ITGB2
SSPN	other			4.06E-02	CTSB
ETV3	transcription regulator			4.06E-02	MMP1
LIMS2	other			4.06E-02	ITGB1
PDE4B	enzyme			4.06E-02	ITGB2
DDR2	kinase			4.06E-02	MMP1
HEYL	transcription regulator			4.06E-02	MYH11
HTRA1	peptidase			4.06E-02	MMP1
TNFRSF14	transmembrane receptor			4.06E-02	MMP1
ST14	peptidase			4.06E-02	MMP1
TSPO	transmembrane receptor			4.06E-02	VDAC1
SFTPC	other			4.06E-02	HSPA5
ADAM15	peptidase			4.06E-02	CD44
ZYX	other			4.06E-02	ITGB1
PCBP1	translation regulator			4.06E-02	HNRNPD
benazepril	chemical drug			4.06E-02	ACTA2
coumestrol	chemical toxicant			4.06E-02	HSP90AB1
IDN-6556	chemical drug			4.06E-02	ACTA2
coumarin	chemical - endogenous mammalian			4.06E-02	GSTP1
RWJ 67657	chemical - kinase inhibitor			4.06E-02	ACTA2
4-aminophenol	chemical - endogenous mammalian			4.06E-02	VIM
CA074-methyl ester	chemical reagent			4.06E-02	CTSB
CV 3988	chemical reagent			4.06E-02	ITGB1
penicillamine	chemical drug			4.06E-02	HSPA5
TGFBR1	kinase			4.15E-02	ACTA2,VIM
Bay 11-7082	chemical - kinase inhibitor			4.15E-02	CHI3L1,HSPA5
AR	ligand-dependent nuclear receptor	Activated	2.000	4.17E-02	CYC1,GSN,GSTP1,HSPA5,VIM
leukotriene D4	chemical - endogenous mammalian			4.31E-02	ITGB1,MMP1
L-methionine	chemical - endogenous mammalian			4.31E-02	ACTA2,HSPA5
MAP2K1/2	group			4.31E-02	CHI3L1,HSPA5
CEBPE	transcription regulator			4.48E-02	ITGAM,SERPINB2
FLI1	transcription regulator			4.48E-02	MMP1,NPM1
RGS10	other			4.48E-02	ITGAM,ITGB2
NKX3-1	transcription regulator			4.48E-02	CTSB,CTSZ
SMARCA2	transcription regulator			4.48E-02	CD44,ITGAM
guanidinopropionic acid	chemical - endogenous non-mammalian			4.48E-02	CYC1,SDHA
doxycycline	chemical drug			4.48E-02	ITGAX,TIMP1
IL1RN	cytokine			4.51E-02	ACTA2,MMP1,TIMP1
SMAD7	transcription regulator			4.60E-02	ACTA2,MMP1,TIMP1
PRKCA	kinase			4.60E-02	CTSB,MMP1,RTN4
ATM	kinase			4.64E-02	ACTB,HSP90AB1
beta-naphthoflavone	chemical toxicant			4.64E-02	FTH1,GSTP1
triolein	chemical drug			4.72E-02	MMP1
APOC3	transporter			4.72E-02	ITGB1
voltage-gated calcium channel	complex			4.72E-02	ITGAM
Aldose Reductase	group			4.72E-02	G6PD
PARP	group			4.72E-02	VIM
SNED1	other			4.72E-02	GAPDH
TCF/LEF	group			4.72E-02	ITGB1
LTB4R2	G-protein coupled receptor			4.72E-02	MMP1
Collagen type III	complex			4.72E-02	ITGB1
Retnla	other			4.72E-02	ACTA2
ASCL2	transcription regulator			4.72E-02	CTSD
EWSR1	other			4.72E-02	LMNA
VCL	enzyme			4.72E-02	ITGB1
PRF1	other			4.72E-02	CD44
mir-194	microRNA			4.72E-02	ACTA2
miR-199a-3p (and other miRNAs w/seed CAGUAGU)	mature microRNA			4.72E-02	CD44
SWAP70	other			4.72E-02	ITGAM
CASQ2	other			4.72E-02	CALR
WFS1	enzyme			4.72E-02	HSPA5
BHLHE41	transcription regulator			4.72E-02	HK2
CLTC	other			4.72E-02	HLA-A
FRS2	other			4.72E-02	ACTA2
RGCC	other			4.72E-02	ACTA2
PPM1A	phosphatase			4.72E-02	ITGB1
PCBP2	other			4.72E-02	HNRNPD
PGK1	kinase			4.72E-02	VIM
MCAM	other			4.72E-02	VIM
PLA2G2A	enzyme			4.72E-02	CD44
porfimer sodium	chemical drug			4.72E-02	HSPD1
raclopride	chemical drug			4.72E-02	SDHA
edaravone	chemical drug			4.72E-02	HSPA5
2-mercaptoethanol	chemical - endogenous mammalian			4.72E-02	HSPA5
cysteamine	chemical drug			4.72E-02	CTSB
cerulenin	chemical drug			4.72E-02	MMP1
2,4-dinitrophenol	chemical toxicant			4.72E-02	ATP5B
rosmarinic acid	chemical - endogenous non-mammalian			4.72E-02	ACTA2
betaine	chemical - endogenous mammalian			4.72E-02	HSPA5
N-chlorotaurine	chemical - kinase inhibitor			4.72E-02	MMP1
lead acetate	chemical toxicant			4.72E-02	GSTP1
thioacetamide	chemical toxicant			4.73E-02	CD44,HK1,PKM,TIMP1
epigallocatechin-gallate	chemical drug			4.95E-02	MMP1,TFRC,TIMP1,VIM
vitamin E	chemical drug			4.98E-02	ACTA2,CD44
IL33	cytokine			4.98E-02	ACAT1,ITGAM
TSH	complex			4.98E-02	FTH1,GAPDH
CCL13	cytokine			4.98E-02	CTSB,MMP1
CCL11	cytokine			4.98E-02	ITGAM,ITGB1
2,3,4,7,8-pentachlorodibenzofuran	chemical toxicant			4.98E-02	CD44,HSPA2
poly rI:rC-RNA	chemical reagent		1.969	1.25E-01	CD44,HLA-A,ITGAM,ITGAX,MMP1
Interferon alpha	group		1.980	1.78E-01	HLA-A,ITGAM,ITGB1,RPL23A
